# Supplementary material
Source: PubMed Central journal article supplement (PMC6726467)

### A Regional Massive Hemorrhage Protocol: Designed with a modified Delphi technique to obtain consensus.

Jeannie L. Callum<sup>1,2</sup>, Calvin H. Yeh<sup>3</sup>, Andrew Petrosiak<sup>3,4</sup>, Mark J. McVey<sup>5,6</sup>, Stephanie Cope<sup>7</sup>, Troy Thompson<sup>7</sup>, Victoria Chin<sup>1</sup>, Keyvan Karkouti<sup>6,8</sup>, Avery B. Nathens<sup>9,10</sup>, Kimmo Murto<sup>11,12</sup>, Suzanne Beno<sup>13,14</sup>, Jacob Pendergrast<sup>2,15</sup>, Andrew McDonald<sup>3,16,17</sup>, Russell MacDonald<sup>3,17</sup>, Neill K.J. Adhikari<sup>18,19</sup>, Asim Alam<sup>6,20</sup>, Donald Arnold<sup>20,21,23</sup>, Lee Barratt<sup>24</sup>, Andrew Beckett<sup>25</sup>, Sue Brennehan<sup>26</sup>, Hina Razzaq Chaudhry<sup>24</sup>, Allison Collins<sup>7</sup>, Margaret Harvey<sup>24</sup>, Jacinthe Lampron<sup>27,28</sup>, Clarita Margarido<sup>6,29</sup>, Amanda McFarlen<sup>30</sup>, Barto Nascimento<sup>9,10</sup>, Wendy Owens<sup>7</sup>, Menaka Pai<sup>21,22,31</sup>, Sandro Rizoli<sup>10,32</sup>, Theodora Ruijs<sup>33</sup>, Robert Skeate<sup>2,23</sup>, Teresa Skelton<sup>5</sup>, Michelle Sholzberg<sup>34</sup>, Kelly Syer<sup>35</sup>, Jami-Lynn Viveiros<sup>1</sup>, Josee Theriault<sup>36</sup>, Alan Tinmouth<sup>37,38,39</sup>, Rardi Van Heest<sup>40</sup>, Susan White<sup>23</sup>, Michelle Zeller<sup>21,22</sup>, and Katerina Pavenski<sup>2,34</sup>.

<sup>1</sup>Department of Laboratory Medicine and Molecular Diagnostics, Sunnybrook Health Sciences Centre, Toronto, Canada

<sup>2</sup>Department of Laboratory Medicine and Pathobiology, University of Toronto, Canada

<sup>3</sup>Division of Emergency Medicine, Department of Medicine, University of Toronto, Canada

<sup>4</sup>Department of Emergency Medicine, St. Michael's Hospital, Toronto, Canada

<sup>5</sup>Department of Anesthesia and Pain Medicine, SickKids, Toronto, Canada

<sup>6</sup>Department of Anesthesia, University of Toronto, Canada

<sup>7</sup>Ontario Regional Blood Coordinating Network, Toronto, Canada

<sup>8</sup>Department of Anesthesia and Pain Management, Sinai Health System, University Health Network, and Women's College Hospital, Toronto, Canada

<sup>9</sup>Department of Surgery, Sunnybrook Health Sciences Centre, Toronto, Canada

<sup>10</sup>Department of Surgery, University of Toronto, Canada

<sup>11</sup>Department of Anesthesiology and Pain Medicine, Children's Hospital of Eastern Ontario, Ottawa, Canada

<sup>12</sup>Department of Anesthesiology and Pain Medicine, University of Ottawa, Canada

<sup>13</sup>Paediatric Emergency Medicine, SickKids, Toronto, Canada

<sup>14</sup>Department of Paediatrics, University of Toronto, Canada

<sup>15</sup>Department of Clinical Pathology, University Health Network, Toronto, Canada

<sup>16</sup>Department of Emergency Services, Sunnybrook Health Sciences Centre, Toronto, Canada

<sup>17</sup>Ornge Transport Medicine, Mississauga, Canada

<sup>18</sup>Department of Critical Care Medicine, Sunnybrook Health Sciences Centre, Toronto, Canada

<sup>19</sup>Interdepartmental Division of Critical Care Medicine, University of Toronto, Canada

<sup>20</sup>Department of Anesthesia, North York General Hospital, Toronto, Canada

<sup>21</sup>McMaster Centre for Transfusion Research, Hamilton, Canada

<sup>22</sup>Department of Medicine, McMaster University, Hamilton, Canada

<sup>23</sup>Canadian Blood Services, Toronto, Canada

<sup>24</sup>St. Michael's Hospital, Toronto, Canada

<sup>25</sup>Department of Surgery, McGill University, Montreal, Canada; and Canadian Forces Health Services, Ottawa, Canada

<sup>26</sup>Sunnybrook Health Sciences Centre, Toronto, Canada

<sup>27</sup>General Surgery, Acute Care and Trauma, The Ottawa Hospital, Canada

<sup>28</sup>Department of Surgery, Faculty of Medicine, University of Ottawa, Canada

<sup>29</sup>Department of Anesthesia, Sunnybrook Health Sciences Centre, Toronto, Canada

<sup>30</sup>Trauma Program and Quality Assurance, St. Michael's Hospital, Toronto, Canada

<sup>31</sup>Department of Pathology and Molecular Medicine, McMaster University

<sup>32</sup>Department of Surgery, St. Michael's Hospital, Toronto, Canada

<sup>33</sup>Department of Pathology, William Osler Health System, Brampton, Canada

<sup>34</sup>Department of Laboratory Medicine, St. Michael's Hospital, Toronto, Canada

<sup>35</sup>Lakeridge Health Corporation, Oshawa, Canada

<sup>36</sup>Department of Critical Care, Health Sciences North, Sudbury, Canada

<sup>37</sup>Division of Hematology, The Ottawa Hospital, Ottawa, Canada

<sup>38</sup>University of Ottawa Centre for Transfusion Research, Ottawa Hospital Research Institute, Canada

1  
2  
3 <sup>39</sup>Departments of Medicine, and Laboratory Medicine & Pathology, University of Ottawa, Canada

4 <sup>40</sup>Department of Surgery, William Osler Health Centre, Brampton, Canada

5 <sup>41</sup>Canadian Blood Services, Ancaster, Canada  
6  
7

8 Corresponding Author: Dr. Jeannie Callum; Address: B204, Sunnybrook Health Sciences Centre, 2075 Bayview  
9 Avenue, Toronto, Ontario, M4N 3M5, Canada.; Email: [Jeannie.Callum@sunnybrook.ca](mailto:Jeannie.Callum@sunnybrook.ca); Phone: (416) 480-4045;  
10 Fax: (416) 480-6035.  
11

12 Funding: Ontario Regional Blood Coordinating Network (Ministry of Health and Long-term Care) and Canadian  
13 Blood Services  
14

15 Key words: Massive Hemorrhage Protocol, Massive Transfusion Protocol, Blood Transfusion  
16

17 Running Header: Foundation for a regional Massive Hemorrhage Protocol  
18

19 Study Type: Modified Delphi Consensus Panel  
20

21 Contributor statement for all authors: All authors contributed to the design, data analysis, or interpretation;  
22 drafted or revised the article; gave final approval of this version; and, agreed to act as a guarantor of the work.  
23

24 Word count for abstract: 245  
25

26 Text count for main document excluding abstract: 2343  
27  
28  
29  
30  
31  
32  
33  
34  
35  
36  
37  
38  
39  
40  
41  
42  
43  
44  
45  
46  
47  
48  
49  
50  
51  
52  
53  
54  
55  
56  
57

**ABSTRACT**

**Background:** A massive hemorrhage protocol (MHP) enables the rapid delivery of blood components to mitigate the consequences of hemorrhagic shock, coagulopathy, and hypothermia in the exsanguinating patient pending definitive hemorrhage control. MHPs are used to facilitate protocol activation/termination, mobilize an interdisciplinary team, provide immediate access to blood, prioritize rapid laboratory testing, and commence hypothermia avoidance strategies. Non-randomized, before-after implementation studies have found an association between MHPs and improved patient outcomes, including mortality. There is variability in MHP implementation rates, content, and protocol compliance due to challenges presented by infrequent activation, variable team performance, and patient acuity. **Methods:** The goal of this study was to identify the key evidence-based principles and quality indicators required to develop a standardized MHP. A modified-Delphi consensus technique involving 36 experts from diverse clinical backgrounds was performed. Panelists used survey links to independently review 43 statements and 8 quality indicators drafted by a steering committee. **Results:** After 3 rounds, consensus was reached for 42 statements and 8 quality indicators. External stakeholder input from all hospitals in Ontario was sought and additional modifications incorporated. **Interpretation:** These MHP recommendations will provide the basis for the design of an MHP toolkit, including specific recommendations for pediatric and obstetrical patients, and for hospitals with limited availability of blood components or means to achieve definitive hemorrhage control. We believe that harmonization of MHPs in our region will simplify training, increase uptake of evidence-based interventions, enhance communication, improve patient comfort and safety, and ultimately improve patient outcomes.

## INTRODUCTION

Hemorrhage is a leading cause of morbidity and mortality after traumatic injury,<sup>1</sup> postpartum hemorrhage,<sup>2</sup> and in complex medical and surgical patients (e.g., upper gastrointestinal bleeding, cardiovascular surgery).<sup>3</sup> A significant proportion of these complications are thought to be preventable.<sup>4-6</sup> Management of unstable hemorrhagic shock is centred on stabilizing the patient with prompt transfusion of blood components and rapid identification and treatment of the source of bleeding. Patient outcome is dependent on the availability of rapid definitive surgical intervention, support of a transfusion medicine and clinical laboratory, prompt access to hemostatic agents, and care provided by a high performing interdisciplinary team.<sup>7</sup> In the trauma literature, protocolized delivery of massive transfusion streamlines the complexities of rapid access to surgical care and blood components, decreases variability of treatment, increases protocol compliance, reduces blood component wastage, facilitates interprofessional communication, and allows for tracking of metrics for continuous quality improvement.<sup>8-11</sup> Most academic institutions have a massive hemorrhage protocol (MHP) in place to rapidly deliver blood components and coordinate care in the setting of traumatic injury.<sup>12</sup> However, the proportion of hospitals with MHPs in non-academic settings is lower and there is significant protocol heterogeneity between hospitals.<sup>13</sup> A systematic review of before-after studies comparing trauma patients managed in time periods with and without an MHP reported an association between MHP use and better survival.<sup>14</sup> The benefits of an MHP have not been tested in rigorous, prospective, randomized trials. Maintaining high levels of compliance with MHPs appears to be a universal challenge.<sup>14,15</sup>

Ontario has the highest population of all Canadian provinces, and provides hospital care in a diverse mixture of high- and low- healthcare resource settings. Massive hemorrhage is an infrequent event in many areas served by small regional hospitals. As a result, access to blood components, laboratory tests of hemostasis, and surgical expertise are highly variable. Instituting an adaptable MHP for the Province based on the local healthcare resource setting is needed to streamline the complex logistics of rapid delivery of blood components, to facilitate rapid patient transfer where required, and to reduce the cognitive burden on bedside clinicians. With the ultimate goal of developing such a protocol, we identified the key principles and quality indicators required to develop a Provincial standardized evidence-based MHP template for hospitals. A multidisciplinary group of content experts was invited to review MHP core tenets and quality indicators drafted by a seven member steering committee. From this process, a consensus document of 42 statements and eight quality metrics emerged that will serve as the basis for the development of a province-wide, standardized, and evidence-driven MHP.

## METHODS

The Delphi technique is a systematic and interactive method which relies on a panel of experts to converge on consensus statements following a series of iterative surveys.<sup>16</sup> Rounds of surveys are continued until consensus is achieved. The Delphi technique is deemed a relevant source of evidence in healthcare research and is particularly important if randomized controlled trials are unavailable to set healthcare policies.<sup>17</sup>

A modified Delphi technique was chosen to establish the framework for the Provincial MHP toolkit. A steering committee composed of transfusion medicine specialists and technologists, and trauma physicians selected the diverse panel members, organized the MHP forum, administered the surveys, and analyzed the results. The steering committee assembled a panel of 36 content experts to represent relevant stakeholders. The panel participation was voluntary and not financially remunerated. The panel included anesthesiologists, trauma surgeons, obstetricians, hematologists, transfusion medicine physicians, emergency physicians, pre-hospital and transport medicine physicians, intensivists, blood supplier representatives, nurses, technologists and a patient representative. The group represented the diverse geographic healthcare program in the province with representatives from academic hospitals, specialized pediatric institutions, suburban hospitals, and smaller rural hospitals.

The panelists were informed of the purpose and scope of the exercise, and the requirement to attend a two day MHP forum, and complete all rounds of the Delphi. To standardize the knowledge base of panelists, they were provided with copies of original papers selected by the steering committee and reflecting the most

1  
2  
3 up-to-date evidence in the area of massive hemorrhage management before the first round. Panelists attended  
4 the MHP forum with both didactic and interactive sessions.

5 The modified Delphi rounds were conducted independently by each panelist via an emailed survey link  
6 (LimeSurvey, Hamburg, Germany). Survey responses were anonymized prior to centralized review. Each  
7 statement was independently rated on a 7 point Likert scale from “definitely should not” to “definitely should  
8 include” in the MHP. There was an “opt out” option for each statement to account for possible lack of expertise  
9 in a specific area (“unable to rate as outside of area of expertise”). Panelists were asked to provide suggestions  
10 to enhance statement clarity with each numerical ranking. Panelists were instructed to answer questions on the  
11 basis of what they considered optimal patient care or best practices, rather than what they believed was  
12 currently operationally feasible at their institution.

13 The first round consisted of 43 statements and eight quality metrics that had been drafted by the steering  
14 committee. Round one also provided panelists with the ability to add statements and quality indicators. Panel  
15 members were not provided access to ratings or comments of the other members to ensure non-biased and  
16 independent statement review. After round one, an in-person meeting was held to discuss the phrasing and  
17 structure of statements scoring below a median of 5.5 (see below). After round one no further in-person  
18 meetings or formal interactions between panel members took place.

19  
20  
21 A priori criteria for disposition of the items in the first round were established as follows:

- 22 1) Items receiving a median Likert score of at least 5.5 (of 7 points) would be accepted as written and not  
23 subject to further rounds. These statements were to be incorporated into a provincial MHP as written,  
24 unless a clear improvement in phrasing was suggested by a panelist that would not change the intent of the  
25 item.
- 26 2) Items scoring 2.6 to 5.4 were discussed at the in-person meeting with all the panelists. Following  
27 discussion, the items were revised by the steering committee and sent out electronically in the 2<sup>nd</sup> round.
- 28 3) Items with scores of 2.5 or less were removed from further rounds, unless there was a strong opposition by  
29 the panel and a revision was drafted for the second round of scoring.
- 30 4) Panelists were provided with a comment box to allow for addition of novel statements and quality  
31 indicators on the first round and were allowed to suggest additional statements and quality indicators at the  
32 in-person meeting. No additional statements were added after round two.

33  
34 A priori criteria for disposition of the items in the second or later round were established as follows:

- 35 1) Items receiving a median Likert score of at least 5.5 would be accepted as written and not subject to  
36 further rounds, unless a clear improvement in phrasing was suggested by a panelist that would not change  
37 the intent of the item.
- 38 2) Items scoring 2.5 to 5.4 were rewritten on the basis of comments by the panelists and sent out in the  
39 third or subsequent round.
- 40 3) Items scoring 2.4 or less were removed from further rounds of scoring.
- 41 4) Where suggested by panelists and/or the steering committee merging or division of statements could  
42 occur where appropriate.

43  
44 After consensus was reached in the final Delphi round, statements were circulated to the Medical  
45 Directors of Transfusion Medicine at all 150 Ontario hospitals with licensed laboratories with a request to  
46 distribute to members of their hospital transfusion committees and MHP leaders for feedback. Feedback was  
47 collated and recommendations incorporated where necessary to improve clarity of the statements and their  
48 justification. All statements and the contents of this manuscript were approved by all authors and panelists.

## 49 **RESULTS**

50  
51  
52 A 100% response rate was achieved from panelists in all three rounds of the modified Delphi (areas of  
53 expertise listed at the end of the paper under Panelists). Round one of the consensus panel was completed on  
54 April 13, 2018, and discussed in-person on April 21, 2018. Rounds two and three were subsequently completed  
55 in May and August of 2018, respectively. Consensus was achieved for all statements by round three, yielding a  
56

1  
2  
3 final consensus document with 42 statements and eight quality indicators. Scores for each statement and  
4 quality indicator for each round are provided in Table 1, and final scoring consensus displayed in Figure 1.  
5 Statements 7, 22, 23, and 34 were broken into their individual components for rounds 2 and 3 due to poor  
6 consensus on round one to assist with understanding the components driving the lack of consensus (see Table  
7 1). Unless otherwise specified, all statements and quality metrics apply to a pediatric MHP. The statements are  
8 presented in Table 2 in a logical order rather than in order of clinical importance and each with a short  
9 rationale.

## 11 DISCUSSION

13 Through a modified Delphi iterative process, we selected and constructed 42 statements and eight  
14 quality indicators to form the foundation for the proposed MHP. The process included one full day educational  
15 symposium, three modified Delphi rounds, one in-person panel meeting, and an external review of the  
16 statements and quality indicators. These statements will form the basis for developing the MHP toolkit which  
17 will include training material, simulation exercises, checklists, template policies and procedures, and patient  
18 material. This initiative was designed to standardize the approach to the massively bleeding patient to decrease  
19 variability in care, reduce cognitive load on providers, improve communication between the clinical and  
20 laboratory teams, increase uptake of evidence-based treatments, and ultimately improve patient outcomes.  
21 Through this initiative we also hope to improve patient comfort and safety, communication with families, and  
22 disclosure of MHP risks to patients.

23 A modified Delphi technique was chosen for the statement selection process due to the absence of  
24 clinical trial evidence for all aspects of the management of the massively bleeding patient. Although clinical  
25 trials provide considerable guidance on the utility of blood component ratios, antifibrinolytic agents, use of  
26 rVIIa, and other areas of management, they fail to provide recommendations on how to construct the protocol,  
27 modifications for community hospitals or specific patient populations. In addition, there are some areas of  
28 massive hemorrhage that are logistical in nature and do not lend themselves to evaluation in clinical trials; for  
29 example: communication procedures, frequency and type of laboratory testing, laboratory resuscitation  
30 targets, and blood component transport and bedside storage. The modified Delphi also allowed the invaluable  
31 input of a patient representative who provided insight into patient communication and the importance of  
32 hypothermia management to ensure patient comfort. Although the lists of statements are not exhaustive, we  
33 hope that they address the current widespread variability in MHP structure.<sup>13,18</sup>

35 Both the modified Delphi process and the community consultation assisted with statement  
36 construction to ensure clarity for both experts in transfusion medicine and healthcare personnel working  
37 outside of the laboratory. There were four areas that required additional rounds and major modifications: (1)  
38 selection of the name of the protocol; (2) selection of the laboratory resuscitation targets; (3) determination of  
39 the pack configurations; and, (4) clarification of the role of rVIIa. The primary obstacle to selecting a unified  
40 name for the protocol was that many hospitals already had longstanding MHPs with specific names. Consensus  
41 on the laboratory targets and pack configuration was achieved in the third Delphi round by splitting statements  
42 into sub-sections for targets and pack configurations. The rVIIa statement required three rounds of review to  
43 ensure the phrasing satisfied the apprehensions of all the panelists for this controversial therapy. Following the  
44 generation of consensus statements, no substantive changes to the statements were made but modifications  
45 were required to clarify the supporting text. The major limitations and challenges to the modified Delphi  
46 process included the limited number of individuals per specialty and hospital type (e.g., obstetrics, remote  
47 hospitals) due to cost and logistical limitations of having additional panelists; panelists ranking statements  
48 based on feasibility and/or cost of recommendations despite instructions to rank based on best practices; and  
49 failure to include panelists involved in hospital blood/sample transportation and communications.

50 We would like to highlight limitations of the existing clinical trial evidence that require additional  
51 clinical studies. First, we do not have randomized clinical trials (either patient-level or cluster-based) to  
52 determine if MHPs improve patient outcomes. Second, a “simplified” version for community hospitals for  
53 stabilization before transfer to a tertiary care centre for definitive care has never been tested. Third, activation  
54 and termination criteria have not been validated in clinical trials. Fourth, the frequency and type of laboratory  
55 testing during an MHP has not been thoroughly investigated. Fifth, the laboratory targets for resuscitation have  
56

never been tested in prospective, randomized trials. Sixth, it is unknown if maintaining normothermia throughout resuscitation will decrease transfusion volumes or improve patient outcomes in the setting of massive hemorrhage. Seventh, it is unknown if fibrinogen concentrates can be considered equivalent to cryoprecipitate or if PCCs can be considered equivalent to plasma for replacement of coagulation factors in this diverse patient population. And lastly, the quality indicators selected here have never been tested to determine if compliance with these 8 metrics will result in improved patient outcomes. Given the numerous items lacking clinical trial evidence, these recommendations will therefore need to be revisited and updated at regular intervals to evolve with this rapidly changing field of medicine. The authors note a particular lack of high quality evidence for pediatric patients due to exclusion of these patients from many clinical trials.

Through a highly structured process and with the involvement of a diverse and knowledgeable group of experts, we are confident that these 42 statements and eight quality indicators will serve as a strong foundation for the creation of a robust MHP toolkit. Through the toolkit, we anticipate that hospitals will achieve higher adoption of evidence-based massive hemorrhage patient care, improved speed of delivery of blood components and hemostatic adjuncts, and more diligent monitoring of clinical and laboratory parameters. There is an opportunity to track patient outcomes in existing prospectively collected databases in trauma, obstetrics, and hospitalized patients (Canadian Institutes for Health Information) in Ontario to understand the impact of this effort to standardize the care of these complex, high-acuity patients.

**Panelists and Conflicts of Interest:** Jeannie Callum (Adult Hematologist and Transfusion Medicine Specialist, tertiary care academic centre with trauma program; disclosures: funding for research from Canadian Blood Services and Octapharma; panelist and steering committee member); Calvin Yeh (Resident in the Royal College Emergency Medicine Training Program, tertiary care academic center with trauma program; disclosures: none; panelist and steering committee member); Andrew Petrosoniak (Emergency Physician and Trauma Team Leader, tertiary care academic centre with trauma program; disclosures: none; panelist); Mark J. McVey (Pediatric Anesthesiologist, tertiary pediatric academic centre with trauma program; disclosures: none; panelist); Stephanie Cope (Project Coordinator, Ontario Regional Blood Coordinating Network; disclosures: none; steering committee member); Troy Thompson (Regional Manager, Ontario Regional Blood Coordinating Network; disclosures: none; panelist and steering committee member); Victoria Chin (University of Waterloo, co-op student; disclosure: none; data analysis); Keyvan Karkouti (Anesthesiologist with expertise in adult cardiovascular surgery related hemorrhage, tertiary care academic centre with cardiac and transplant programs; disclosures: funding for research and honoraria from Instrumentation Laboratory and Octapharma; panelist); Avery Nathens (Adult Trauma and General Surgeon, academic trauma centre; Disclosures: none; Panelist); Kimmo Murto (Pediatric Anesthesiologist, former Cardiac Anesthesia specialist and Transfusion Medicine Committee Chair, pediatric tertiary care academic center with trauma program; disclosures: none; pediatric content expert); Suzanne Beno (Pediatric Emergentologist and Pediatric Trauma Specialist, tertiary pediatric academic centre with trauma program; disclosures: none; panelist); Jacob Pendergrast (Adult Hematologist and Transfusion Medicine Specialist, Medical Director for numerous rural and remote transfusion services; Disclosures: none; panelist); Andrew McDonald (Adult Trauma Team Leader, Emergency Physician, tertiary care centre; Transport Medicine Physician, Provincial air ambulance service; no disclosures; panelist); Neill Adhikari (Intensivist, university-affiliated hospital; no disclosures; panelist); Asim Alam (Anesthesiologist and Transfusion Medicine Specialist, Chief of Anesthesia, North York General Hospital; previous consulting funding from Medtronic and Zoll Corporation for non-related activities; panelist); Donald M. Arnold (Adult Hematologist, Director, McMaster Centre for Transfusion Research, Associate Professor, Department of Medicine, McMaster University; no disclosures; panelist); Lee Barratt (Nurse Practitioner, Regional Geriatric Program, St. Michael's Hospital, formerly Nurse Educator, Emergency Department, at a tertiary care trauma unit; disclosures: none; panelist); Andrew Beckett (Civilian trauma and general surgeon, academic tertiary care centre, Surgeon for the National Defense and Canadian Armed Forces; Disclosures: None; panelist); Sue Brenneman (Adult critical care nurse at a trauma hospital; Disclosures: None; Panelist); Hina Chaudhry (Research Program Manager – CELTIC Connect, Department of Laboratory Medicine, St. Michael's Hospital, (formerly Medical Technical Specialist – Special Coagulation, Department of Laboratory Medicine, St. Michael's Hospital; disclosures: none; panelist); Allison Collins (General Pathologist and Laboratory Medical Director, community hospital, Physician Clinical Projects Coordinator with the Ontario Regional Blood Coordinating

1  
2  
3 Network; disclosures: none; panelist); Margaret Harvey (Patient representative; disclosures: none; panelist);  
4 Jacinthe Lampron (General surgeon with subspecialty in trauma, academic trauma centre; disclosures: none;  
5 panelist); Russell D. MacDonald (Emergency Medicine and Prehospital Care Specialist/Medical Director; tertiary  
6 care academic centre with trauma program; provincial air and land critical care transport program; municipal  
7 and paramedic/ambulance service; disclosures: none; panelist and steering committee member); Clarita  
8 Margarido (Anesthesiologist; tertiary care academic centre with trauma and high risk obstetrics programs; no  
9 disclosures; panelist); Amanda McFarlan (Registered Nurse Trauma Program Registry Manager & Quality  
10 Assurance Specialist, tertiary care academic centre with trauma program; no disclosures; panelist); Barto  
11 Nascimento (Trauma Team Leader, tertiary academic trauma centre; disclosures: none; panelist and steering  
12 committee member); Wendy Owens (Program Manager, Ontario Regional Blood Coordinating Network;  
13 disclosures: none; panelist); Menaka Pai (Adult Hematologist and Thrombosis Physician, Transfusion Medicine  
14 Quality Specialist, tertiary care academic centre with trauma program; disclosures: speaker honoraria from  
15 Novartis and BMS-Pfizer; panelist); Sandro Rizoli (Adult trauma and general surgeon, academic tertiary centre;  
16 disclosure: none; panelist); Theodora Ruijs (General Pathologist and Transfusion Medicine Laboratory Director,  
17 large community hospital; disclosures: none; panelist); Robert Skeate (Transfusion Medicine Specialist,  
18 Canadian Blood Services Associate Medical Director; disclosures: funding for research from Canadian Blood  
19 Services; panelist). Michelle Sholzberg (Adult Hematologist, Medical Director of Coagulation Laboratory, tertiary  
20 care academic centre with trauma program; disclosures: unrestricted research funding from Octapharma and  
21 Shire, Member of IQMH Hematology Scientific Committee, Member of Test Review and Utilization Committee  
22 of MOHLTC; panelist); Teresa Skelton (Pediatric Anesthesiologist, tertiary pediatric academic centre with  
23 trauma program; disclosures: none; panelist); Kelly Syer (Registered Nurse, Transfusion Safety Officer,  
24 community hospital; disclosures: none; panelist); Jami-Lynn Viveiros (MLT in Transfusion Medicine and Tissue  
25 Bank, tertiary care academic centre with trauma program; disclosures: none; panelist); Josee Theriault  
26 (Intensivist, North East Local Health Integration Network critical care lead, northern tertiary academic centre  
27 with Trauma program; disclosures: none; panelist); Alan Tinmouth (Adult Hematologist and Hemostasis Expert,  
28 tertiary care academic centre; disclosures: research funding from Canadian Blood Services and Canadian  
29 Institute for Health Research and medical consultant for Canadian Blood Services; panelist); Rardi van  
30 Heest (General Surgeon, large community hospital; no disclosures; panelist); Susan White (MLT, Hospital Liaison  
31 Specialist, Blood Supplier; disclosures: none; panelist); Michelle P. Zeller (Adult Hematologist and Transfusion  
32 Medicine Specialist, tertiary care academic centre with trauma program; Medical Officer, Canadian Blood  
33 Services; disclosures: funding for research from Canadian Blood Services; Pfizer ad boards; panelist); Katerina  
34 Pavenski (Adult Hematologist and Transfusion Medicine Specialist, tertiary care academic centre with trauma  
35 program; disclosures: funding for research from Octapharma, CSL Behring; steering committee member).  
36  
37  
38  
39  
40  
41  
42  
43  
44  
45  
46  
47  
48  
49  
50  
51  
52  
53  
54  
55  
56  
57



**Table 1.** Results of the 3 rounds with scores are provided on a 7 point Likert scale. Counts are provided where panelists were asked to rank or choose between options rather than use the Likert score. Green denotes passed with minor or no phrase adjustment (empty green box denotes passed on a preceding round). Red denotes statements that did not pass based on numerical scoring and/or critical written comments resulting in a major content revision. Gray denotes statements that were not accepted and then merged for the subsequent round. Blue denotes a new statement that was added after round one. Split rows denote the need for division of the statement into its components for the scoring round.

| Statement | Round 1<br>Median (Range; abstaining votes) | Round 2<br>Median (Range; abstaining votes) or Counts where appropriate                                                                                                                                                                                                | Round 3<br>Median (Range; abstaining votes) or Counts where appropriate |
|-----------|---------------------------------------------|------------------------------------------------------------------------------------------------------------------------------------------------------------------------------------------------------------------------------------------------------------------------|-------------------------------------------------------------------------|
| 1         | 7 (5-7; 1)                                  |                                                                                                                                                                                                                                                                        |                                                                         |
| 2         | 7 (5-7; 1)                                  |                                                                                                                                                                                                                                                                        |                                                                         |
| 3         | 7 (4-7; 3)                                  |                                                                                                                                                                                                                                                                        |                                                                         |
| 4         | 7 (1-7; 1)                                  |                                                                                                                                                                                                                                                                        |                                                                         |
| 5         | 6 (2-7; 2)                                  | 7 (4-7; 3)                                                                                                                                                                                                                                                             |                                                                         |
| 6         | 7 (5-7; 1)                                  |                                                                                                                                                                                                                                                                        |                                                                         |
| 7         | 6 (2-7; 2)                                  | 6 (1-7; 1)                                                                                                                                                                                                                                                             | Overhead "Code Transfusion": Rank 1                                     |
| 8         | 6 (3-7; 1)                                  |                                                                                                                                                                                                                                                                        |                                                                         |
| 9         | 7 (4-7; 2)                                  |                                                                                                                                                                                                                                                                        |                                                                         |
| 10        | 6 (2-7; 4)                                  | 7 (5-7; 1)                                                                                                                                                                                                                                                             |                                                                         |
|           | 7 (4-7; 4)                                  |                                                                                                                                                                                                                                                                        |                                                                         |
| 11        | 7 (4-7; 1)                                  |                                                                                                                                                                                                                                                                        |                                                                         |
| 12        | 7 (3-7; 1)                                  |                                                                                                                                                                                                                                                                        |                                                                         |
| 13        | 7 (3-7; 1)                                  |                                                                                                                                                                                                                                                                        |                                                                         |
| 14        | 6 (2-7; 4)                                  | 7 (2-7; 1)                                                                                                                                                                                                                                                             |                                                                         |
| 15        | 7 (3-7; 2)                                  |                                                                                                                                                                                                                                                                        |                                                                         |
| 16        | 7 (3-7; 1)                                  |                                                                                                                                                                                                                                                                        |                                                                         |
| 17        | 7 (1-7; 1)                                  | 7 (2-7; 1)                                                                                                                                                                                                                                                             |                                                                         |
| 18        | 7 (4-7; 2)                                  |                                                                                                                                                                                                                                                                        |                                                                         |
| 19        | NA                                          | 7 (1-7; 0)                                                                                                                                                                                                                                                             |                                                                         |
| 20        | 7 (4-7; 2)                                  |                                                                                                                                                                                                                                                                        |                                                                         |
| 21        | 6 (2-7; 1)                                  |                                                                                                                                                                                                                                                                        |                                                                         |
| 22        | 7 (2-7; 1)                                  | Yes to need for test:<br>CBC, INR, iCalcium 36/36;<br>Fibrinogen 35/36; pH 34/36;<br>PTT 29/36; Electrolytes 32/36;<br>lactate 30/36                                                                                                                                   |                                                                         |
| 23        | 7 (2-7; 3)                                  | Hemoglobin >80 g/L 31/36<br>INR <1.8 26/36<br>Fibrinogen >1.5 g/L 24/36<br>Platelet >50 x10 <sup>9</sup> /L 26/36<br>iCalcium >1.15 mmol/L 17/36<br>INR <1.5 11/36<br>Fibrinogen >2.0 g/L 12/36<br>Platelet >100 x10 <sup>9</sup> /L 12/36<br>iCalcium >1 mmol/L 11/36 |                                                                         |
| 24        | 7 (4-7; 5)                                  | 7 (5-7; 4)                                                                                                                                                                                                                                                             |                                                                         |
| 25        | 7 (4-7; 4)                                  |                                                                                                                                                                                                                                                                        |                                                                         |
| 26        | 7 (4-7; 7)                                  |                                                                                                                                                                                                                                                                        |                                                                         |
| 27        | 7 (2-7; 4)                                  |                                                                                                                                                                                                                                                                        |                                                                         |
| 28        | 6 (4-7; 3)                                  | 7 (2-7; 1)                                                                                                                                                                                                                                                             |                                                                         |
| 29        | 7 (2-7; 5)                                  |                                                                                                                                                                                                                                                                        |                                                                         |
| 30        | 7 (4-7; 1)                                  |                                                                                                                                                                                                                                                                        |                                                                         |
| 31        | 7 (2-7; 1)                                  | 7 (6-7; 1)                                                                                                                                                                                                                                                             |                                                                         |

|      |              |            |                                                       |
|------|--------------|------------|-------------------------------------------------------|
| 32   | 7 (2-7; 11)  | 7 (5-7; 5) |                                                       |
| 33   | 7 (1-7; 3)   |            |                                                       |
| 34   | 6 (3-7; 4)   | 6 (1-7; 4) | Platelet transfusion based on count:<br>7 (1-7; 4)    |
|      |              |            | Communicate if no platelet<br>transfusion: 6 (2-7; 4) |
|      |              |            | Box 1: 7 (1-7; 2)                                     |
|      |              |            | Box 2: 7 (2-7; 4)                                     |
|      |              |            | Box 3: 7 (1-7; 4)                                     |
|      |              |            | Small hospital Box 2: 7 (2-7; 5)                      |
|      |              |            | Convert to lab-guided: 7 (2-7; 5)                     |
| 35   | 7 (3-7; 8)   | 7 (2-7; 6) |                                                       |
| 36   | 7 (4-7; 6)   | 7 (5-7; 6) |                                                       |
| 37   | 6 (1-7; 11)  | 7 (3-7; 4) |                                                       |
| 38   | 7 (1-7; 1)   |            |                                                       |
| 39   | 7 (1-7; 2)   | 7 (4-7; 1) |                                                       |
| 40   | 6 (4-7; 5)   | 7 (4-7; 4) |                                                       |
|      | 6 (2-7; 8)   |            |                                                       |
|      | 6.5 (2-7; 5) |            |                                                       |
| 41   | 7 (5-7; 1)   |            |                                                       |
| 42-1 | 7 (1-7; 4)   | 7 (4-7; 2) |                                                       |
| 42-2 | 7 (1-7; 2)   | 7 (2-7; 1) |                                                       |
| 42-3 | 6 (1-7; 5)   | 7 (5-7; 1) |                                                       |
| 42-4 | 7 (1-7; 6)   | 7 (4-7; 1) |                                                       |
| 42-5 | 6 (1-7; 2)   | 7 (1-7; 1) |                                                       |
| 42-6 | 6.5 (1-7; 2) | 7 (4-7; 1) |                                                       |
| 43-7 | 7 (1-7; 2)   | 7 (4-7; 1) |                                                       |
| 42-8 | 6 (1-7; 2)   | 7 (3-7; 1) |                                                       |

Table 2: Statements and quality indicators with rationale.

| Statement | Description                                                                                                                                                                                                                                                                                                                                                                                                                                                                                                                                                                                                                                                                                                                                                                                                                                                                                                                                                                                                                                                                                                                                                                                                                                                                                                                                                                                                                                                                                                                                                                                                                                                                                                   |
|-----------|---------------------------------------------------------------------------------------------------------------------------------------------------------------------------------------------------------------------------------------------------------------------------------------------------------------------------------------------------------------------------------------------------------------------------------------------------------------------------------------------------------------------------------------------------------------------------------------------------------------------------------------------------------------------------------------------------------------------------------------------------------------------------------------------------------------------------------------------------------------------------------------------------------------------------------------------------------------------------------------------------------------------------------------------------------------------------------------------------------------------------------------------------------------------------------------------------------------------------------------------------------------------------------------------------------------------------------------------------------------------------------------------------------------------------------------------------------------------------------------------------------------------------------------------------------------------------------------------------------------------------------------------------------------------------------------------------------------|
| 1         | <b>All hospitals shall have a protocol to guide the management of a massively bleeding patient.</b> The panel concluded that an MHP is required to standardize the approach to the massively bleeding patient for all hospitals. For the purposes of the MHP, a hospital is defined as any organization that either maintains a red cell inventory or staffs an emergency department, urgent care centre, critical care unit, labour and delivery, or operating room. The panel recognized there are small clinic facilities where a bleeding patient may be encountered but where transfusion is currently not available and an MHP would not be appropriate. The panel concluded that a policy for rapid transport of patients with massive hemorrhage to a facility with an MHP would be required at such a facility.                                                                                                                                                                                                                                                                                                                                                                                                                                                                                                                                                                                                                                                                                                                                                                                                                                                                                      |
| 2         | <b>The protocol shall be developed by a multidisciplinary team and approved by the Hospital Transfusion Committee (or other relevant multidisciplinary committee).</b> The MHP requires support from multiple hospital services including, but not limited to: emergency, trauma, surgery, anesthesiology, critical care, blood transport personnel, communication services, and laboratory personnel. <sup>10</sup> The protocol should be reviewed and approved by the Hospital Transfusion Committee (or other relevant hospital committee) and the Medical Advisory Committee.                                                                                                                                                                                                                                                                                                                                                                                                                                                                                                                                                                                                                                                                                                                                                                                                                                                                                                                                                                                                                                                                                                                            |
| 3         | <b>The protocol shall incorporate the principles of damage control resuscitation, specifically giving highest priority to treating the source of hemorrhage.</b> Damage control resuscitation principles in traumatic injury include abbreviated surgical and/or endovascular interventions for hemorrhage control and management of intra-abdominal contamination, critical care support to correct deranged physiologic measures (hypothermia, acidosis, coagulopathy); with definitive surgical repair delayed until stabilization and hemostatic control have been achieved. <sup>19</sup> In the severely injured trauma population, damage control resuscitation is associated with reduced mortality, although the approach has never been tested in a randomized controlled trial. <sup>14,20,21</sup> Ongoing hemorrhage leads to worsening coagulopathy and other physiologic derangements. <sup>22</sup> Although the role of damage control resuscitation outside of traumatic injury is unknown, prompt hemorrhage control is likely to be an important component of care. <sup>23,24</sup>                                                                                                                                                                                                                                                                                                                                                                                                                                                                                                                                                                                                      |
| 4         | <b>The protocol shall consider the available resources at the institution.</b> The hospital must consider the available resources of the institution when developing the local protocol. Centres caring for pediatric patients should ensure personnel are prepared for weight-based dosing and the use of size specific equipment (e.g. warming devices, intravenous infusion equipment). Smaller and more remote hospitals located at a distance from the blood supplier will need to make adjustments to streamline their MHP to compensate for the limited number of team members, blood component inventory and laboratory testing menus, and ability to provide definitive surgical or endovascular control of hemorrhage. The MHP will need to specify, if required, which and how patients should be transferred in a timely manner to other facilities for definitive treatment. Examples for simplification for smaller/remote sites include: (1) pre-labelled uncrossmatched red blood cell (RBC) units ready for immediate transfusion; (2) pre-prepared laboratory sample collection kits; (3) administration of a single bolus of tranexamic acid rather than an infusion; (4) administration of Prothrombin Complex Concentrates (PCC) and fibrinogen concentrate instead of plasma and cryoprecipitate; (5) use of point of care technology for laboratory testing; and (6) cross-training hospital personnel from other patient care areas.                                                                                                                                                                                                                                                  |
| 5         | <b>A single protocol for all patients is preferred in order to ensure compliance; there should be specific guidance provided for select patient populations (e.g., obstetrical patients should receive early fibrinogen replacement).</b> A survey from academic hospitals found that 60% of respondents have a single protocol for all patients. <sup>25</sup> Compliance with a single MHP is poor in published studies, <sup>11,15,26</sup> raising the concern that consistent care would be further compromised by multiple protocols for different bleeding scenarios. The panel recommended a single, standardized protocol in response to the massively bleeding patient with options to tailor the protocol for specific patient populations. Examples: In massive obstetrical hemorrhage, consideration should be given to measuring fibrinogen levels early and repeatedly, administering fibrinogen replacement if the level falls below 2.0 g/L, <sup>27</sup> and use of an intrauterine balloon device as a bridge to definitive bleeding control. <sup>28</sup> In gastrointestinal hemorrhage, consideration should be given for prompt endoscopic therapy for hemorrhage control. <sup>29,30</sup> In post-cardiac surgery hemorrhage, there is evidence to support the use of viscoelastic testing (as compared to standard laboratory tests) in reducing the risk of major bleeding. <sup>31</sup> Pediatric patients require weight-based dosing of blood components and hemostatic adjuncts, consideration for potentially higher transfusion triggers depending on co-morbidities and age, and provider awareness of increased risk for hyperkalemia and hypothermia. <sup>32-35</sup> |
| 6         | <b>The protocol should be reviewed at a minimum of every three years.</b> The science and clinical trial activity in the area of massive hemorrhage, coagulopathy, and MHPs is rapidly evolving. Each institutional MHP should                                                                                                                                                                                                                                                                                                                                                                                                                                                                                                                                                                                                                                                                                                                                                                                                                                                                                                                                                                                                                                                                                                                                                                                                                                                                                                                                                                                                                                                                                |

|    |                                                                                                                                                                                                                                                                                                                                                                                                                                                                                                                                                                                                                                                                                                                                                                                                                                                                                                                                                                                                                                                                                                                                                                                                                                                                                                                                                                                                                                                                                                                                                                                                                                                                                                                                                                                                                                                                                                                               |
|----|-------------------------------------------------------------------------------------------------------------------------------------------------------------------------------------------------------------------------------------------------------------------------------------------------------------------------------------------------------------------------------------------------------------------------------------------------------------------------------------------------------------------------------------------------------------------------------------------------------------------------------------------------------------------------------------------------------------------------------------------------------------------------------------------------------------------------------------------------------------------------------------------------------------------------------------------------------------------------------------------------------------------------------------------------------------------------------------------------------------------------------------------------------------------------------------------------------------------------------------------------------------------------------------------------------------------------------------------------------------------------------------------------------------------------------------------------------------------------------------------------------------------------------------------------------------------------------------------------------------------------------------------------------------------------------------------------------------------------------------------------------------------------------------------------------------------------------------------------------------------------------------------------------------------------------|
|    | be reviewed at a minimum of every three years to ensure alignment with the scientific evidence and the Provincial MHP. The protocol revision should be conducted by a multidisciplinary team as detailed in Statement 2, and approved by the Hospital Transfusion Committee and the Medical Advisory Committee.                                                                                                                                                                                                                                                                                                                                                                                                                                                                                                                                                                                                                                                                                                                                                                                                                                                                                                                                                                                                                                                                                                                                                                                                                                                                                                                                                                                                                                                                                                                                                                                                               |
| 7  | <b>The protocol shall be called “The Massive Hemorrhage Protocol”, and if activated as an overhead announcement, referred to as “Code Transfusion”.</b> The existence of several different terms for the protocol across Ontario has created confusion and delays to activation (e.g., a trainee calling communications to activate the Code Omega protocol at a hospital that activates the protocol by calling the transfusion medicine laboratory to activate the “massive transfusion protocol”). The panel, after much deliberation, has chosen the protocol name of the “ <b>Massive Hemorrhage Protocol</b> ” for the following reasons: (1) Massive transfusion is most commonly defined in adults as a transfusion of 10 or more units of RBCs in a 24 hour period - however, some patients will not survive to receive 10 units and many patients between 4 and 10 units need additional therapies contained in an MHP; (2) The name highlights the importance of definitive hemorrhage control; and (3) An MHP is more than just a transfusion protocol and includes non-transfusion interventions (e.g., maintenance of normothermia, use of antifibrinolytics). The panel agreed that the method for MHP activation should be site-specific and clearly defined in the protocol, but that if a hospital-wide overhead announcement was implemented, a standard term should be used at all institutions. The consensus term chosen by the panel is “ <b>Code Transfusion</b> ” due to its clarity, ease of pronunciation, and lack of overlap phonetically with other “colour” codes (e.g., Code Bleed or Code Blood with Code Blue). The value of an overhead announcement is that it provides redundancy if the paging system fails and notifies all hospital employees that the laboratory is under acute pressure (and to refrain from calling for non-emergency blood products and non-urgent test results). |
| 8  | <b>Participating team members should have access to formal training and drills to increase awareness, adherence, and effective delivery of the MHP.</b> To achieve high levels of team performance and protocol adherence, team members require access to formal training material and exposure to multidisciplinary drills or simulations. This is particularly important for high-stress and rarely encountered massive hemorrhage scenarios. Simulations have been successfully employed for training in obstetrical hemorrhage, <sup>36</sup> pediatric hemorrhage, <sup>37</sup> and trauma. <sup>38</sup> A systematic review of 33 studies involving 1,203 resident and medical student participants found simulation was associated with improved provider behavior and patient outcomes. <sup>39</sup> In a systematic review of 13 studies of trauma team training, both non-technical skills and team-based performance improved. <sup>40</sup> Importantly, these improvements extend to patient outcomes as simulation-based training is associated with improved outcomes in trauma and cardiac arrest care. <sup>41,42</sup>                                                                                                                                                                                                                                                                                                                                                                                                                                                                                                                                                                                                                                                                                                                                                                                   |
| 9  | <b>The written MHP should be readily accessible as a reference tool for all team members.</b> To achieve high levels of protocol compliance among staff, ready access to the MHP is required. The local institution should develop resources (either in electronic or paper format) to assist clinicians with MHP compliance. The format and medium should be dictated by the local hospital circumstances.                                                                                                                                                                                                                                                                                                                                                                                                                                                                                                                                                                                                                                                                                                                                                                                                                                                                                                                                                                                                                                                                                                                                                                                                                                                                                                                                                                                                                                                                                                                   |
| 10 | <b>The transport service(s) should be promptly notified if the decision is made to transfer the patient to another hospital for definitive hemorrhage control. If required, the patient should be transferred as soon as and as safely as possible by appropriate staff and transport resources, to an institution where definitive hemorrhage control can be performed.</b> There are 150 hospitals in Ontario that have access to transfusion support. Due to Ontario’s large geographic size and numerous remote regions, it would not be possible to have large stocks of blood components available at all hospitals without very high levels of wastage. Timely evacuation of massively bleeding patients from smaller centres to larger centres capable of definitive hemorrhage control is needed for two reasons: (1) small blood stocks held in remote hospitals (typically small number of RBCs, no platelet pools, and limited stocks of frozen plasma); and, (2) lack of access to definitive surgical or radiologic intervention to allow for hemorrhage control. There is little published on evacuation time targets within civilian settings. Rapid evacuation (<60 minutes) among military trauma patients with non-compressible torso injury and amputation injury is associated with reduced mortality. <sup>43</sup> Clinicians working with limited capacity to achieve surgical hemostasis should aim to transfer as soon and as safely as possible.                                                                                                                                                                                                                                                                                                                                                                                                                                                   |
| 11 | <b>The protocol shall have activation criteria.</b> Under-activation (i.e. delayed or no activation of MHP for patients who require hemorrhage control and blood components) could be catastrophic as it may result in otherwise preventable exsanguination. Retrospective studies suggest that delays in initial blood component administration is associated with worse outcomes (each 1 minute delay to the arrival of the first pack of blood components is associated with a 5% increase in the risk of death). <sup>44</sup> In contrast, over-activation (i.e., MHP activation that is ultimately not required) may lead to unnecessary transfusion, wastage of blood components, and diversion of human resources away from competing needs. Despite concern that appropriate and timely activation are critical, there are no criteria with both high sensitivity and specificity for predicting the need for massive transfusion. The two most commonly used scores validated in this setting are the Shock Index (blood pressure divided by heart rate or modified pediatric shock index <sup>45</sup> ) and the ABC score (one point each for                                                                                                                                                                                                                                                                                                                                                                                                                                                                                                                                                                                                                                                                                                                                                                     |

|    |                                                                                                                                                                                                                                                                                                                                                                                                                                                                                                                                                                                                                                                                                                                                                                                                                                                                                                                                                                                                                                                                                                                                                                                                                                                                                                                                                                    |
|----|--------------------------------------------------------------------------------------------------------------------------------------------------------------------------------------------------------------------------------------------------------------------------------------------------------------------------------------------------------------------------------------------------------------------------------------------------------------------------------------------------------------------------------------------------------------------------------------------------------------------------------------------------------------------------------------------------------------------------------------------------------------------------------------------------------------------------------------------------------------------------------------------------------------------------------------------------------------------------------------------------------------------------------------------------------------------------------------------------------------------------------------------------------------------------------------------------------------------------------------------------------------------------------------------------------------------------------------------------------------------|
|    | penetrating injury, blood pressure $\leq 90$ mmHg, heart rate $\geq 120$ and positive FAST (Focused Assessment with Sonography for Trauma on ultrasound), with the shock index performing slightly better in traumatic injury. <sup>46</sup> New data suggest that resuscitation intensity ( $\geq 4$ units of fluid in first 30 minutes with "1 unit" defined as any of 1 U RBC, 1 U plasma, 500 mL colloid, or 1L crystalloid) may represent an important alternative metric to identify patients who require MHP activation. <sup>47</sup> In pediatric patients, a retrospective study of combat injured children defined massive transfusion as requirement for $\geq 40$ mL/kg of blood components transfused within 24 hours. <sup>48</sup> Given the current lack of evidence to support one set of activation criteria over another, the activation criteria should be set by the hospital to meet the needs of the local patient population.                                                                                                                                                                                                                                                                                                                                                                                                             |
| 12 | <b>The protocol shall have termination criteria.</b> Termination of the protocol allows personnel to return unused blood components to regular inventory, cease ordering blood components from the blood supplier, cease thawing of frozen components, and divert resources to competing needs. In contrast, premature termination may lead to a reduction in the number of team members at the bedside, in the frequency of laboratory testing, and in the availability of blood components. Termination should be considered when bleeding source control has been attained, hemodynamic stability has been achieved, vasopressor requirements have diminished, and the transfusion rate has slowed such that additional transport personnel are no longer required. Typically when these features are present, transfusion decisions can be guided by laboratory test results. <sup>49</sup> As no explicit criteria have been validated, termination criteria should be determined at the local hospital level. The method to communicate the termination of the MHP should be specified in the local hospital protocol.                                                                                                                                                                                                                                       |
| 13 | <b>The protocol shall specify the team members required to respond when the protocol is activated.</b> Executing all of the necessary tasks specified in an MHP, in addition to all the other clinical tasks required to achieve surgical control of blood loss, will require mobilization of an interdisciplinary team. The precise composition of the clinical team can be modified by the acuity of the hemorrhage, the location of the patient, the type of hemorrhage, and the institution's available resources. For example, the neonatal team will be required to attend postpartum hemorrhages to provide immediate care for the neonate, while in trauma MHPs managed in the trauma room where nursing to patient ratios are already high, additional nursing staff may not be required. Given the association between survival and the time arrival of the first cooler of blood components, a dedicated transport team for both blood samples and components is critical.                                                                                                                                                                                                                                                                                                                                                                              |
| 14 | <b>The protocol should specify how the lead clinician at the bedside is designated.</b> How the lead clinician for the MHP is assigned should be specified in the local hospital protocol as it will be highly variable depending on the patient population served and the institutional resources. A broad range of physicians could serve as the team leader. In addition, in smaller organizations without on-site physicians, a nurse practitioner or midwife may be the most appropriate team leader. There may be a transition in leadership as the patient moves from one location to another. The process of handover from one leader to the next should be explicitly stated in the protocol. There must be training in non-technical skills for the team leads to promote high performance for communication, situational awareness, and decision-making skills. In simulation training, higher performance on non-technical skills by the team lead (situational awareness and decision making) correlates with critical task completion and improved team performance. <sup>50</sup> Simulation training for clinicians leading trauma resuscitation improves confidence and reduces anxiety. <sup>51</sup> Formal feedback of trauma team leaders in training by faculty is associated with improvement in leadership skills over time. <sup>52</sup> |
| 15 | <b>The protocol shall specify the team member(s) designated to be responsible for blood component and sample transport.</b> The protocol shall specify the team members designated to be responsible for both the transportation of blood components and patient blood samples for laboratory testing. Although the protocol specifies the use of a ratio-based resuscitation (standardized RBCs to plasma) to mitigate the risk of coagulopathy, this does not prevent over-transfusion or provide assurance that coagulation competence will be maintained. <sup>53</sup> Early and repeated laboratory testing (with rapid transportation of the samples to the laboratory) to confirm adequacy of transfusion resuscitation is required. It is also critical that blood components are rapidly supplied to the bedside and that empty coolers are returned to the transfusion medicine laboratory.                                                                                                                                                                                                                                                                                                                                                                                                                                                             |
| 16 | <b>The transfusion medicine laboratory and the core laboratory shall be notified of all MHP activations.</b> Early and prompt notification of the transfusion medicine laboratory will assist with timely blood component delivery, rapid transition to group specific blood, and designation of the transfusion medicine technologist team leader. A single individual on the clinical side should be the sole source of contact between the clinical team and the transfusion medicine technologist leader so as to reduce the risk of duplicate transfusion orders. Activation of the core laboratory technologists will ensure designation of the laboratory technologist team leader, rapid identification of MHP samples, prioritization of the testing, complete testing of all required tests for the MHP, and immediate communication of test results to the clinical team.                                                                                                                                                                                                                                                                                                                                                                                                                                                                               |

|    |                                                                                                                                                                                                                                                                                                                                                                                                                                                                                                                                                                                                                                                                                                                                                                                                                                                                                                                                                                                                                                                                                                                                                                                                                                                                                                                                                                                                                                                                                                                                                                                                                                                                                                                                                                                                                                                                                                                                                                                                                                                                                                                                                                               |
|----|-------------------------------------------------------------------------------------------------------------------------------------------------------------------------------------------------------------------------------------------------------------------------------------------------------------------------------------------------------------------------------------------------------------------------------------------------------------------------------------------------------------------------------------------------------------------------------------------------------------------------------------------------------------------------------------------------------------------------------------------------------------------------------------------------------------------------------------------------------------------------------------------------------------------------------------------------------------------------------------------------------------------------------------------------------------------------------------------------------------------------------------------------------------------------------------------------------------------------------------------------------------------------------------------------------------------------------------------------------------------------------------------------------------------------------------------------------------------------------------------------------------------------------------------------------------------------------------------------------------------------------------------------------------------------------------------------------------------------------------------------------------------------------------------------------------------------------------------------------------------------------------------------------------------------------------------------------------------------------------------------------------------------------------------------------------------------------------------------------------------------------------------------------------------------------|
| 17 | <p><b>All critical laboratory results and important coagulation parameters (hemoglobin, platelet count, INR, and fibrinogen) shall be communicated verbally to the clinical team as soon as they are available.</b> During MHP activation, the clinical team may not have ready access to the electronic health record due to patient acuity and clinical area layout. It is therefore required that all critical results (preliminary or complete, and as defined by the local laboratory) and important coagulation results (hemoglobin, platelet count, INR, and fibrinogen) be verbally communicated to the clinical team as soon as the results are available. This may mitigate the risks of under-transfusion or over-transfusion, and improve time to correction of other biochemical derangements (hyperkalemia, hypocalcemia, acidosis). The “push of information” is thought to be an important tool to improve team performance.<sup>54</sup> Consideration should be given to having dedicated mobile phones to mitigate the risk of communication failure between the laboratory and the clinical team due to rapid movement of the clinical team from one hospital location to another.</p>                                                                                                                                                                                                                                                                                                                                                                                                                                                                                                                                                                                                                                                                                                                                                                                                                                                                                                                                                                    |
| 18 | <p><b>The timing of protocol activation and termination shall be recorded in the patient’s chart.</b> Documentation of the activation and termination times must be recorded in the patient chart in the format specified by the local institutional policy. This could be documented by hand or electronically in the nursing or physician notes or in the electronic computerized physician ordering system. These times are necessary during the review of the patient chart for the purposes of quality improvement.</p>                                                                                                                                                                                                                                                                                                                                                                                                                                                                                                                                                                                                                                                                                                                                                                                                                                                                                                                                                                                                                                                                                                                                                                                                                                                                                                                                                                                                                                                                                                                                                                                                                                                  |
| 19 | <p><b>Patients and/or their Substitute Decision Maker for whom the massive hemorrhage protocol was activated should be informed. Actual (e.g., transfusion-associated circulatory overload, hyperkalemia, etc.) and potential adverse effects should be disclosed. Furthermore, women of childbearing potential should be informed of the risk of red blood cell alloimmunization.</b> At the earliest possible opportunity, the most responsible physician (or delegate) must have a conversation with the patient and/or their substitute decision maker regarding why the MHP was activated, the number and types of components transfused, the transfusion complications observed, and the potential long-term consequences of transfusion. Informed consent for transfusion should be obtained as per local hospital policy. Patients have variable perceptions related to transfusion risks<sup>55</sup> and accurate communication of the potential risks is important to achieve patient-centered care. Individuals of childbearing potential should be informed of the risk of red cell alloimmunization that may result in hemolytic disease of the fetus and newborn and should be counseled to undergo red blood cell antibody screening at 6 weeks and/or 6 months post-transfusion (many antibodies are evanescent and there is a brief window for detection).<sup>56</sup></p>                                                                                                                                                                                                                                                                                                                                                                                                                                                                                                                                                                                                                                                                                                                                                                                 |
| 20 | <p><b>The collection and testing of the group and screen sample shall be prioritized in the protocol to mitigate the impact on group O red blood cells and AB plasma stocks.</b> Both group O RBCs and AB plasma are in chronic short supply in Canada. The proportion of group O RBCs transfused to non-group O recipients is increasing, with trauma accounting for 10% of this pressure on group O blood stocks.<sup>57</sup> The vast majority of AB plasma units are transfused to non-AB recipients.<sup>58</sup> Given the pressure on AB plasma stocks, it has not been possible to provide male-only AB plasma for all recipients with resultant cases of transfusion-related acute lung injury from female AB plasma.<sup>59</sup> Hence, the draw of the group and screen sample, rapid transport of the sample to the laboratory, and testing of the sample should be prioritized.</p>                                                                                                                                                                                                                                                                                                                                                                                                                                                                                                                                                                                                                                                                                                                                                                                                                                                                                                                                                                                                                                                                                                                                                                                                                                                                            |
| 21 | <p><b>Laboratory testing should be done at baseline and at a minimum hourly until the protocol is terminated.</b> See rationale below for statement 22.</p>                                                                                                                                                                                                                                                                                                                                                                                                                                                                                                                                                                                                                                                                                                                                                                                                                                                                                                                                                                                                                                                                                                                                                                                                                                                                                                                                                                                                                                                                                                                                                                                                                                                                                                                                                                                                                                                                                                                                                                                                                   |
| 22 | <p><b>The recommended minimum laboratory testing (where the test is available) at each blood draw should be: CBC, INR, activated partial thromboplastin time (aPTT; baseline only), fibrinogen, electrolytes, calcium (ionized), blood gas (pH and base excess) and lactate.</b> Baseline laboratory testing is prognostic,<sup>60</sup> identifies patients on oral anticoagulant medications in need of reversal, and directs immediate need for components in excess of the base ratio of RBCs to plasma. Although the proposed MHP includes the use of early ratio-based resuscitation for plasma prior to availability of laboratory test results of coagulation, this does not guarantee that coagulopathy will be prevented and raises the risk of over-transfusion of unnecessary blood components. Laboratory confirmation of adequate hemostatic resuscitation is required at least hourly. Current guidelines recommend early and repeated measures of hematology and coagulation parameters.<sup>21</sup> The measurement of the aPTT is only recommended at baseline to detect anticoagulant effect of certain anticoagulants (e.g., dabigatran) and preexisting bleeding disorders (e.g., hemophilia). If the baseline INR and aPTT are correlated then further aPTT measures are not indicated and may in fact delay release of the other coagulation test results.<sup>61</sup> The magnitude of the elevation of the PTT in postpartum hemorrhage is associated with worse outcomes; however, there is considerable overlap and minimal difference between outcome groups to be clinically useful.<sup>27</sup> Transitioning from blind ratio based component therapy to one based on either conventional laboratory testing or point of care viscoelastic testing has the potential to minimize unnecessary transfusions and allow for targeted component therapy.<sup>31</sup> Biochemical tests (e.g. potassium, calcium, and pH) may indicate potential complications from massive transfusion or inadequate resuscitation of hemorrhagic shock. Lactate measurements are also predictive of mortality, although the role of serial measurements in</p> |

|    |                                                                                                                                                                                                                                                                                                                                                                                                                                                                                                                                                                                                                                                                                                                                                                                                                                                                                                                                                                                                                                                                                                                                                                                                                                                                                              |
|----|----------------------------------------------------------------------------------------------------------------------------------------------------------------------------------------------------------------------------------------------------------------------------------------------------------------------------------------------------------------------------------------------------------------------------------------------------------------------------------------------------------------------------------------------------------------------------------------------------------------------------------------------------------------------------------------------------------------------------------------------------------------------------------------------------------------------------------------------------------------------------------------------------------------------------------------------------------------------------------------------------------------------------------------------------------------------------------------------------------------------------------------------------------------------------------------------------------------------------------------------------------------------------------------------|
|    | improving patient outcomes has not been confirmed in clinical trials. <sup>62</sup>                                                                                                                                                                                                                                                                                                                                                                                                                                                                                                                                                                                                                                                                                                                                                                                                                                                                                                                                                                                                                                                                                                                                                                                                          |
| 23 | <b>The protocol should state the minimum laboratory protocol resuscitation targets for transfusion: (1) hemoglobin &gt; 80 g/L (RBC); (2) INR &lt; 1.8 (plasma or prothrombin complex concentrates); (3) Fibrinogen &gt; 1.5 g/L (cryoprecipitate or fibrinogen concentrates); (4) platelets &gt; 50 x10<sup>9</sup>/L; (5) ionized calcium &gt; 1.15 mmol/L. Relevant transfusion targets can also be used if viscoelastic testing is performed.</b> As there are no prospective studies evaluating laboratory resuscitation targets in the setting of massive bleeding, the suggested laboratory targets are based on the consensus opinion of the panelists and are concordant with the published literature. <sup>21,63</sup> These are minimum targets to be maintained throughout the resuscitation and are not meant to be overly prescriptive (i.e., restricting blood component issue based on the above values). Certain pediatric populations, such as neonates, patients with congenital heart disease, receiving extracorporeal life support, or in severe respiratory distress may require higher thresholds for RBC transfusion during an MHP. <sup>33-35</sup>                                                                                                               |
| 24 | <b>All massively bleeding patients should have a temperature measured within 15 minutes of arrival or protocol activation and then at a minimum of every 30 minutes (or continuously where available) until the protocol is terminated.</b> See rationale below for statement 26.                                                                                                                                                                                                                                                                                                                                                                                                                                                                                                                                                                                                                                                                                                                                                                                                                                                                                                                                                                                                            |
| 25 | <b>All patients should receive interventions to prevent hypothermia and achieve normothermia (<math>\geq 36^{\circ}\text{C}</math>).</b> See rationale below for statement 26.                                                                                                                                                                                                                                                                                                                                                                                                                                                                                                                                                                                                                                                                                                                                                                                                                                                                                                                                                                                                                                                                                                               |
| 26 | <b>All patients should receive warmed intravenous fluids, red blood cells and plasma to avoid hypothermia.</b> In both traumatic injury and postpartum hemorrhage, temperature monitoring is infrequently performed and when measured, hypothermia is common. <sup>64,65</sup> Hypothermia in traumatic injury is associated with worse outcomes, <sup>66,67</sup> although prospective trials have not confirmed whether aggressive warming protocols would alter outcomes. <sup>68</sup> Mild hypothermia is associated with a 22% increase in the risk of transfusion. <sup>69</sup> Warming of patients improves their comfort and therefore even in the absence of a confirmed survival benefit it should be a core part of every MHP. <sup>70</sup>                                                                                                                                                                                                                                                                                                                                                                                                                                                                                                                                    |
| 27 | <b>Red blood cells should be delivered in a validated container to prevent wastage.</b> RBCs are a valuable resource requiring strategies to reduce wastage during transport to and storage at the patient bedside. Numerous investigators have validated that wastage can be mitigated with appropriate temperature controlled devices with resultant substantial cost savings. <sup>71,72</sup> At large academic centres with frequent MHP activation, all components should be transported in validated containers to mitigate component wastage.                                                                                                                                                                                                                                                                                                                                                                                                                                                                                                                                                                                                                                                                                                                                        |
| 28 | <b>The MHP protocol should ensure there are processes in place to ensure an uninterrupted supply of blood components to the bedside.</b> The local MHP should include processes to ensure an uninterrupted supply of blood components to the bedside until termination. Specifically, the next cooler should be brought to the patient location before the previous cooler is empty. This will minimize the risk of lacking necessary blood components during the resuscitation. The person assigned to maintain the uninterrupted supply of blood components should be specified in the protocol. The procedure for requesting the next set of blood components should be stated in the protocol, easy to perform in the setting of massive hemorrhage, and designed with the intention of preventing wrong patient transfusion errors. The delivery of blood components to the bedside should not be equated with an order for transfusion.                                                                                                                                                                                                                                                                                                                                                |
| 29 | <b>If the blood group is unknown, O Rh D-negative red blood cells should only be used for female patients of childbearing potential (age &lt; 45).</b> O Rh D-negative stocks are insufficient to allow all patients of unknown blood group to be supported with O Rh D-negative RBCs until the blood group is resulted in the laboratory information system. The risk of alloimmunization in an Rh D-negative patient after exposure to Rh D-positive RBCs in the setting of major bleeding is 20%. <sup>73,74</sup> Immunization to the D-antigen is only relevant for females who wish to have future pregnancies. Over 99% of births occur in women under the age of 45 years, <sup>75</sup> and hospital MHPs should restrict the use of O Rh D-negative RBCs for women under this age. For conscious women, efforts should be made to determine their age early in the course of care so that the transfusion medicine service can be instructed to supply the optimal Rh D-type of blood. The risk of immunization from Rh D-positive platelets is 1% and therefore Rh-immunoglobulin should only be provided to Rh D-negative women under the age of 45 (after transfer to the intensive care unit but within 72 hours of the Rh D-incompatible platelet transfusion). <sup>76</sup> |
| 30 | <b>Uncrossmatched red blood cells shall be available at the bedside within 10 minutes of MHP activation.</b> See rationale below for statement 31.                                                                                                                                                                                                                                                                                                                                                                                                                                                                                                                                                                                                                                                                                                                                                                                                                                                                                                                                                                                                                                                                                                                                           |
| 31 | <b>In bleeding patients in need of red blood cell transfusion, uncrossmatched red blood cells should be transfused until crossmatch compatible red blood cells are available.</b> In retrospective analyses in trauma resuscitation, faster time to delivery of the first pack of RBCs is associated with superior survival (every 1 minute delay to the first pack was associated with a 5% increase in the odds of mortality). <sup>44</sup> Collection of the group and screen sample, transport of the sample to the laboratory, centrifugation of the sample, testing and result release into the laboratory information system require approximately 70-90 minutes. Therefore,                                                                                                                                                                                                                                                                                                                                                                                                                                                                                                                                                                                                         |

|                                                                                                                                 | following MHP activation, it is not appropriate to wait for crossmatch-compatible RBCs. The transfusion laboratory must have a protocol and process for the immediate release of uncrossmatched RBCs. In severe traumatic injury, where communication from the pre-hospital emergency services suggests the patient will need immediate transfusion due to hemodynamic instability and severe injury, it is appropriate to order RBCs to the emergency department in advance of patient arrival.                                                                                                                                                                                                                                                                                                                                                                                                                                                                                                                                                                                                                                                                                                                                                                                                                                                                                                                                                                                                                                                                                                                                                                                                                                                                                                                                                                                                                                                                                                                                                                                                                                                                                                                                                                                                                                                                                                                                                                                                                                                                                                                                                                                                                                                                                                                                                                                                                                                                                                                                                                                                                                                                                                                                                                                         |                   |                                              |                             |                           |                                       |                                                                                                                                                                                                                                                                 |                                                                                                                                 |           |                                                                                                                   |                                                                                                                                                                                                                                                                                |
|---------------------------------------------------------------------------------------------------------------------------------|------------------------------------------------------------------------------------------------------------------------------------------------------------------------------------------------------------------------------------------------------------------------------------------------------------------------------------------------------------------------------------------------------------------------------------------------------------------------------------------------------------------------------------------------------------------------------------------------------------------------------------------------------------------------------------------------------------------------------------------------------------------------------------------------------------------------------------------------------------------------------------------------------------------------------------------------------------------------------------------------------------------------------------------------------------------------------------------------------------------------------------------------------------------------------------------------------------------------------------------------------------------------------------------------------------------------------------------------------------------------------------------------------------------------------------------------------------------------------------------------------------------------------------------------------------------------------------------------------------------------------------------------------------------------------------------------------------------------------------------------------------------------------------------------------------------------------------------------------------------------------------------------------------------------------------------------------------------------------------------------------------------------------------------------------------------------------------------------------------------------------------------------------------------------------------------------------------------------------------------------------------------------------------------------------------------------------------------------------------------------------------------------------------------------------------------------------------------------------------------------------------------------------------------------------------------------------------------------------------------------------------------------------------------------------------------------------------------------------------------------------------------------------------------------------------------------------------------------------------------------------------------------------------------------------------------------------------------------------------------------------------------------------------------------------------------------------------------------------------------------------------------------------------------------------------------------------------------------------------------------------------------------------------------|-------------------|----------------------------------------------|-----------------------------|---------------------------|---------------------------------------|-----------------------------------------------------------------------------------------------------------------------------------------------------------------------------------------------------------------------------------------------------------------|---------------------------------------------------------------------------------------------------------------------------------|-----------|-------------------------------------------------------------------------------------------------------------------|--------------------------------------------------------------------------------------------------------------------------------------------------------------------------------------------------------------------------------------------------------------------------------|
| 32                                                                                                                              | <b>There is no threshold of units of group O red blood cells above which a switch to group specific red blood cells is prohibited. The switch to group specific red blood cells and plasma should be done as soon as possible.</b> Each unit of RBCs in Canada is produced with a minimal amount of residual plasma (less than 30 mL per unit) and therefore even after 10 to 20 units of group O RBCs the amount of incompatible plasma is trivial and does not preclude a transition to group specific RBCs.                                                                                                                                                                                                                                                                                                                                                                                                                                                                                                                                                                                                                                                                                                                                                                                                                                                                                                                                                                                                                                                                                                                                                                                                                                                                                                                                                                                                                                                                                                                                                                                                                                                                                                                                                                                                                                                                                                                                                                                                                                                                                                                                                                                                                                                                                                                                                                                                                                                                                                                                                                                                                                                                                                                                                                           |                   |                                              |                             |                           |                                       |                                                                                                                                                                                                                                                                 |                                                                                                                                 |           |                                                                                                                   |                                                                                                                                                                                                                                                                                |
| 33                                                                                                                              | <b>The protocol shall state the reversal strategy for commonly used oral anticoagulants.</b> The MHP protocol shall include a table with all approved anticoagulant therapies and their appropriate reversal strategy, including the dosage(s) of the therapies to be administered.                                                                                                                                                                                                                                                                                                                                                                                                                                                                                                                                                                                                                                                                                                                                                                                                                                                                                                                                                                                                                                                                                                                                                                                                                                                                                                                                                                                                                                                                                                                                                                                                                                                                                                                                                                                                                                                                                                                                                                                                                                                                                                                                                                                                                                                                                                                                                                                                                                                                                                                                                                                                                                                                                                                                                                                                                                                                                                                                                                                                      |                   |                                              |                             |                           |                                       |                                                                                                                                                                                                                                                                 |                                                                                                                                 |           |                                                                                                                   |                                                                                                                                                                                                                                                                                |
| 34                                                                                                                              | <p><b>The initial management of the rapidly bleeding patient that precludes the use of laboratory-guided transfusion should begin with immediate red blood cell (RBC) transfusion and then transfusions at a RBC:plasma ratio of 2:1.</b> Two prospective randomized trials have failed to confirm a survival benefit of a RBC:plasma ratio of 1:1 (compared to 2:1).<sup>77,78</sup> A large retrospective review of experience before and after implementation of 1:1 resuscitation failed to find a mortality benefit.<sup>79</sup> The Canadian consensus conference on massive transfusion recommended a ratio of 2:1 (RBC:plasma) followed by transition to laboratory-guided blood component administration as soon as possible.<sup>80</sup> The standard approach outlined below, and based on expert consensus, is applicable to most large adult hospitals. No blood components should be transfused without a clear order and specified infusion rate from the team leader or delegate. Simplified options are provided for institutions that do not stock plasma, platelets and/or cryoprecipitate (or are unable to provide the components in a rapid manner due to limited numbers of personnel or lack of thawing devices), or that cannot provide definitive surgical or radiological care, and the goal is to stabilize in preparation for transport out by land or air ambulance. Pediatric institutions should develop age and weight based MHP component protocols to ensure that blood components and fractionated coagulation factors are delivered in appropriate ratios. In institutions that care for pediatric patients, the transfusion boxes must come with clear instructions for the clinical team to mitigate the risk of over- or under-transfusion.</p> <table border="1"> <thead> <tr> <th>Standard approach</th> <th>Simplified options for smaller organizations</th> </tr> </thead> <tbody> <tr> <td>Box 1 should contain 4 RBC.</td> <td>No modification required.</td> </tr> <tr> <td>Box 2 should contain 4 RBC, 4 plasma.</td> <td>Box 2 (where plasma <b>not</b> stocked in hospital transfusion laboratory) should contain 4 RBC, 2000 IU PCC, and 4 grams Fibrinogen Concentrate. Efforts should be made to transfer the bleeding patient to a centre capable of definitive hemorrhage control.</td> </tr> <tr> <td>Box 3* should contain 4 RBC, 2 plasma, and fibrinogen replacement (10 units Cryoprecipitate or 4 grams Fibrinogen concentrate).</td> <td>As above.</td> </tr> <tr> <td>Platelets, when stocked in the hospital transfusion laboratory, should be transfused based on the platelet count.</td> <td>Platelets, when <b>not</b> stocked in the hospital transfusion laboratory, should be ordered in for transfusion (if patient cannot be promptly transferred out). If patient is transferred before platelets transfused, this should be communicated to the receiving hospital.</td> </tr> </tbody> </table> <p>* Few patients will require more than 12 RBCs due to an acute hemorrhage. By 12 units of RBCs, transfusion decisions for plasma and fibrinogen replacement should be made based on the hourly measurement of the INR and the fibrinogen levels and orders communicated promptly to the blood bank.</p> | Standard approach | Simplified options for smaller organizations | Box 1 should contain 4 RBC. | No modification required. | Box 2 should contain 4 RBC, 4 plasma. | Box 2 (where plasma <b>not</b> stocked in hospital transfusion laboratory) should contain 4 RBC, 2000 IU PCC, and 4 grams Fibrinogen Concentrate. Efforts should be made to transfer the bleeding patient to a centre capable of definitive hemorrhage control. | Box 3* should contain 4 RBC, 2 plasma, and fibrinogen replacement (10 units Cryoprecipitate or 4 grams Fibrinogen concentrate). | As above. | Platelets, when stocked in the hospital transfusion laboratory, should be transfused based on the platelet count. | Platelets, when <b>not</b> stocked in the hospital transfusion laboratory, should be ordered in for transfusion (if patient cannot be promptly transferred out). If patient is transferred before platelets transfused, this should be communicated to the receiving hospital. |
| Standard approach                                                                                                               | Simplified options for smaller organizations                                                                                                                                                                                                                                                                                                                                                                                                                                                                                                                                                                                                                                                                                                                                                                                                                                                                                                                                                                                                                                                                                                                                                                                                                                                                                                                                                                                                                                                                                                                                                                                                                                                                                                                                                                                                                                                                                                                                                                                                                                                                                                                                                                                                                                                                                                                                                                                                                                                                                                                                                                                                                                                                                                                                                                                                                                                                                                                                                                                                                                                                                                                                                                                                                                             |                   |                                              |                             |                           |                                       |                                                                                                                                                                                                                                                                 |                                                                                                                                 |           |                                                                                                                   |                                                                                                                                                                                                                                                                                |
| Box 1 should contain 4 RBC.                                                                                                     | No modification required.                                                                                                                                                                                                                                                                                                                                                                                                                                                                                                                                                                                                                                                                                                                                                                                                                                                                                                                                                                                                                                                                                                                                                                                                                                                                                                                                                                                                                                                                                                                                                                                                                                                                                                                                                                                                                                                                                                                                                                                                                                                                                                                                                                                                                                                                                                                                                                                                                                                                                                                                                                                                                                                                                                                                                                                                                                                                                                                                                                                                                                                                                                                                                                                                                                                                |                   |                                              |                             |                           |                                       |                                                                                                                                                                                                                                                                 |                                                                                                                                 |           |                                                                                                                   |                                                                                                                                                                                                                                                                                |
| Box 2 should contain 4 RBC, 4 plasma.                                                                                           | Box 2 (where plasma <b>not</b> stocked in hospital transfusion laboratory) should contain 4 RBC, 2000 IU PCC, and 4 grams Fibrinogen Concentrate. Efforts should be made to transfer the bleeding patient to a centre capable of definitive hemorrhage control.                                                                                                                                                                                                                                                                                                                                                                                                                                                                                                                                                                                                                                                                                                                                                                                                                                                                                                                                                                                                                                                                                                                                                                                                                                                                                                                                                                                                                                                                                                                                                                                                                                                                                                                                                                                                                                                                                                                                                                                                                                                                                                                                                                                                                                                                                                                                                                                                                                                                                                                                                                                                                                                                                                                                                                                                                                                                                                                                                                                                                          |                   |                                              |                             |                           |                                       |                                                                                                                                                                                                                                                                 |                                                                                                                                 |           |                                                                                                                   |                                                                                                                                                                                                                                                                                |
| Box 3* should contain 4 RBC, 2 plasma, and fibrinogen replacement (10 units Cryoprecipitate or 4 grams Fibrinogen concentrate). | As above.                                                                                                                                                                                                                                                                                                                                                                                                                                                                                                                                                                                                                                                                                                                                                                                                                                                                                                                                                                                                                                                                                                                                                                                                                                                                                                                                                                                                                                                                                                                                                                                                                                                                                                                                                                                                                                                                                                                                                                                                                                                                                                                                                                                                                                                                                                                                                                                                                                                                                                                                                                                                                                                                                                                                                                                                                                                                                                                                                                                                                                                                                                                                                                                                                                                                                |                   |                                              |                             |                           |                                       |                                                                                                                                                                                                                                                                 |                                                                                                                                 |           |                                                                                                                   |                                                                                                                                                                                                                                                                                |
| Platelets, when stocked in the hospital transfusion laboratory, should be transfused based on the platelet count.               | Platelets, when <b>not</b> stocked in the hospital transfusion laboratory, should be ordered in for transfusion (if patient cannot be promptly transferred out). If patient is transferred before platelets transfused, this should be communicated to the receiving hospital.                                                                                                                                                                                                                                                                                                                                                                                                                                                                                                                                                                                                                                                                                                                                                                                                                                                                                                                                                                                                                                                                                                                                                                                                                                                                                                                                                                                                                                                                                                                                                                                                                                                                                                                                                                                                                                                                                                                                                                                                                                                                                                                                                                                                                                                                                                                                                                                                                                                                                                                                                                                                                                                                                                                                                                                                                                                                                                                                                                                                           |                   |                                              |                             |                           |                                       |                                                                                                                                                                                                                                                                 |                                                                                                                                 |           |                                                                                                                   |                                                                                                                                                                                                                                                                                |
| 35                                                                                                                              | <b>Recombinant factor VIIa (rVIIa) should only be considered when massive hemorrhage is refractory to surgical hemostasis, medical optimization of coagulation parameters, acidosis, and hypocalcemia, and used in consultation with an expert in the management of coagulopathy in the massively bleeding patient.</b> Recombinant activated factor VIIa (rVIIa) has not been shown to improve mortality in prospective, randomized controlled trials. <sup>81,82</sup> In contrast, rVIIa is associated with an increase in thromboembolic complications. <sup>82</sup> Given the concerns regarding lack of efficacy and potential risks, all other lower risk hemostatic therapies should be exhausted and it should only be used in consultation with an expert in the management of coagulopathy of the massively bleeding patient.                                                                                                                                                                                                                                                                                                                                                                                                                                                                                                                                                                                                                                                                                                                                                                                                                                                                                                                                                                                                                                                                                                                                                                                                                                                                                                                                                                                                                                                                                                                                                                                                                                                                                                                                                                                                                                                                                                                                                                                                                                                                                                                                                                                                                                                                                                                                                                                                                                                |                   |                                              |                             |                           |                                       |                                                                                                                                                                                                                                                                 |                                                                                                                                 |           |                                                                                                                   |                                                                                                                                                                                                                                                                                |
| 36                                                                                                                              | <b>Fibrinogen concentrate 4 grams (equivalent to approximately 10 U of cryoprecipitate) can be used as a reasonable alternative to cryoprecipitate for fibrinogen replacement.</b> Cryoprecipitate in Canada is provided                                                                                                                                                                                                                                                                                                                                                                                                                                                                                                                                                                                                                                                                                                                                                                                                                                                                                                                                                                                                                                                                                                                                                                                                                                                                                                                                                                                                                                                                                                                                                                                                                                                                                                                                                                                                                                                                                                                                                                                                                                                                                                                                                                                                                                                                                                                                                                                                                                                                                                                                                                                                                                                                                                                                                                                                                                                                                                                                                                                                                                                                 |                   |                                              |                             |                           |                                       |                                                                                                                                                                                                                                                                 |                                                                                                                                 |           |                                                                                                                   |                                                                                                                                                                                                                                                                                |



|    |                                                                                                                                                                                                                                                                                                                                                                                                                                                                                                                                                                                                                                                                                                                                                                                                                                                                                                                                                                                                                                                                                                                                                                                                                                                                                                                                                                                                                                                                                                                                                                                                                                                                                                                                                                                                                                                                                                                                                                                                                        |
|----|------------------------------------------------------------------------------------------------------------------------------------------------------------------------------------------------------------------------------------------------------------------------------------------------------------------------------------------------------------------------------------------------------------------------------------------------------------------------------------------------------------------------------------------------------------------------------------------------------------------------------------------------------------------------------------------------------------------------------------------------------------------------------------------------------------------------------------------------------------------------------------------------------------------------------------------------------------------------------------------------------------------------------------------------------------------------------------------------------------------------------------------------------------------------------------------------------------------------------------------------------------------------------------------------------------------------------------------------------------------------------------------------------------------------------------------------------------------------------------------------------------------------------------------------------------------------------------------------------------------------------------------------------------------------------------------------------------------------------------------------------------------------------------------------------------------------------------------------------------------------------------------------------------------------------------------------------------------------------------------------------------------------|
|    | <p>as individual units that must be thawed, reconstituted with saline and then pooled. This takes approximately 30-45 minutes of technologist's time and may compete with their ability to perform laboratory testing or prepare other components. The product can only be kept for one year after donation. It must be transported frozen at all times. Once thawed and pooled it expires after 4 hours. Given the time intensive preparation requirements and limited shelf-life, it is reasonable for some hospitals to transition to pathogen-reduced fibrinogen concentrates. There are no large randomized controlled trials of cryoprecipitate and fibrinogen concentrates to determine equivalence, although a large trial in cardiac surgery related hemorrhage is ongoing (FIBRES Study, NCT03037424).<sup>83</sup> For pediatric patients a dose of approximately 50 mg/kg of fibrinogen concentrate up to a maximum of 4 grams is suggested.<sup>84</sup></p>                                                                                                                                                                                                                                                                                                                                                                                                                                                                                                                                                                                                                                                                                                                                                                                                                                                                                                                                                                                                                                              |
| 37 | <p><b>At institutions lacking sufficient resources to issue plasma (e.g., no thawing device or no plasma stocked in inventory), Prothrombin Complex Concentrates (PCC) 2000 IU can be substituted for coagulation factor replacement. Fibrinogen replacement should be given concurrently with PCCs unless the fibrinogen level is known to be <math>\geq 1.5\text{g/L}</math>.</b> Similar to the challenges with cryoprecipitate, some smaller organizations may have challenges in providing plasma during an MHP (no thawing device or not stocked in the laboratory due to rarity of use). In these situations, a reasonable option is to transfuse PCCs and fibrinogen concentrates. This is a common strategy employed in many European countries and outcomes appear to be similar to a plasma resuscitation strategy in trauma, usually guided by viscoelastic point-of-care testing.<sup>85</sup> This strategy should be seen as a bridge prior to transport to an institution capable of definitive surgical management and more complete transfusion support. For pediatric patients a dose of 25 IU/kg of PCCs (rounded to the closest 500 IU) up to a maximum of 2000 units is suggested.<sup>86,87</sup></p>                                                                                                                                                                                                                                                                                                                                                                                                                                                                                                                                                                                                                                                                                                                                                                                           |
| 38 | <p><b>Patient and product identification pre-transfusion bedside check shall be performed prior to transfusion of any component to avoid mistransfusion.</b> Transfusion-related errors remain common in the emergency department.<sup>88,89</sup> Under no circumstances can the patient and product identification pre-transfusion bedside check be aborted, especially in mass casualty scenarios where there may be multiple patients receiving blood components simultaneously.</p>                                                                                                                                                                                                                                                                                                                                                                                                                                                                                                                                                                                                                                                                                                                                                                                                                                                                                                                                                                                                                                                                                                                                                                                                                                                                                                                                                                                                                                                                                                                               |
| 39 | <p><b>Patient demographics shall not be updated/changed until after termination of the protocol. Once MHP is terminated, patient demographics should be updated as soon as possible.</b> Patients admitted during major hemorrhage or after traumatic injury are frequently registered with a temporary name and number (e.g., Unidentified, Andrew) or with an incomplete registration (e.g., no date of birth). Modifications to key identifiers during active resuscitation may delay the issue of blood components from the transfusion service or may result in an erroneous incompatibility detected at the pre-transfusion bedside check. The update of the patient identification should be delayed until the patient has stabilized and with coordination between the nursing team and the transfusion medicine laboratory to ensure no gaps in release of laboratory test results or transfusion support.</p>                                                                                                                                                                                                                                                                                                                                                                                                                                                                                                                                                                                                                                                                                                                                                                                                                                                                                                                                                                                                                                                                                                |
| 40 | <p><b>Tranexamic acid should be administered as soon as intravenous or intraosseous access is achieved but within 3-hours from time of injury or within 3-hours from MHP activation in all other patients.</b> Tranexamic acid improves mortality in the setting of trauma<sup>90</sup> and postpartum hemorrhage.<sup>91</sup> It is most effective when given immediately, with the survival benefit decreasing by 10% for every 15 minute delay in administration and with no benefit after 3 hours from injury/onset of bleeding.<sup>92</sup> There is no increased risk of venous or arterial thromboembolic complications.<sup>93</sup> Dosages and infusion rates vary depending on the study protocol (1 gram bolus plus 1 gram infusion over 8 hours,<sup>90</sup> 1 gram bolus and 1 gram bolus repeated at 1 hour,<sup>94</sup> 1 gram bolus and repeated if ongoing bleeding at 30 minutes or greater<sup>91</sup>, 2 gram bolus at the scene of the injury[Trial submitted; add reference when available]). Dosage and infusion rate should be determined by the local institution. Simplification may be needed in more resource-challenged locations and a single 2 gram bolus may be preferred. Evidence for tranexamic acid is currently limited in pediatric trauma, but it is accepted practice for use in pediatric trauma patients requiring transfusion within the same time parameters as adults. For pediatric patients the initial bolus of tranexamic acid can be dosed at 15 mg/kg up to a maximum of 1 gram and additional doses/infusion based on local policy.<sup>95,96</sup> The role of tranexamic acid in gastrointestinal bleeding has not been confirmed; a large multicenter trial is underway (HALT-IT; NCT01658124) to determine if tranexamic acid assists with hemostasis and reduces transfusion or mortality rates.<sup>97</sup> Tranexamic acid should be readily available in clinical areas where massive hemorrhage is common to prevent delays in administration.</p> |
| 41 | <p><b>MHP activations should be reviewed by a multidisciplinary committee for quality assurance.</b> Compliance with MHPs is poor during the resuscitation of a critically ill patient who has multiple competing priorities.<sup>11,15</sup> Implementation of an MHP is just the first step to improving the care of massively bleeding patients; training, simulations, check-lists, audit and feedback are needed to achieve high levels of performance. At a minimum, the quality metrics listed in statement 42 should be tracked on consecutive MHP activations by a multidisciplinary team with feedback to the frontline staff at regular intervals.</p>                                                                                                                                                                                                                                                                                                                                                                                                                                                                                                                                                                                                                                                                                                                                                                                                                                                                                                                                                                                                                                                                                                                                                                                                                                                                                                                                                      |

|    |                                                                                                                                                                                                     |                                                                                                                                                                                                                              |                 |                      |
|----|-----------------------------------------------------------------------------------------------------------------------------------------------------------------------------------------------------|------------------------------------------------------------------------------------------------------------------------------------------------------------------------------------------------------------------------------|-----------------|----------------------|
| 42 | <b>The following quality metrics should be tracked on all activations of the protocol and the data reviewed quarterly at the hospital transfusion committee and the Medical Advisory Committee:</b> |                                                                                                                                                                                                                              |                 |                      |
|    |                                                                                                                                                                                                     | Quality metric                                                                                                                                                                                                               | Local Reporting | Provincial Reporting |
|    | Q1                                                                                                                                                                                                  | The proportion of patients receiving tranexamic acid within 1 hour of protocol activation.                                                                                                                                   | X               | X                    |
|    | Q2                                                                                                                                                                                                  | The proportion of patients in whom RBC transfusion is initiated within 15 minutes of protocol activation.                                                                                                                    | X               | X                    |
|    | Q3                                                                                                                                                                                                  | The proportion of patients (of patients requiring transfer for definitive care) with initiation of call for transfer within 60 minutes of protocol activation.                                                               | X               |                      |
|    | Q4                                                                                                                                                                                                  | The proportion of patients achieving a temperature $\geq 35^{\circ}\text{C}$ at termination of the protocol.                                                                                                                 | X               |                      |
|    | Q5                                                                                                                                                                                                  | The proportion of patients with hemoglobin levels maintained between 60-110 g/L during protocol activation, excluding certain pediatric populations (e.g., neonates) that may require higher hemoglobin values.              | X               |                      |
|    | Q6                                                                                                                                                                                                  | The proportion of patients transitioned to group specific RBCs and plasma within 90 minutes of arrival/onset of hemorrhage.                                                                                                  | X               | X                    |
|    | Q7                                                                                                                                                                                                  | The proportion of patients with appropriate activation ( $\geq 6$ RBC units in first 24 hours; $>40$ ml/kg/24 hours of RBCs in pediatric patients) or before this level in patients dying due to hemorrhage within 24 hours. | X               |                      |
| Q8 | The proportion of patients without any blood component wastage (including plasma that is thawed and not used within the 5 day limit on another patient).                                            | X                                                                                                                                                                                                                            |                 |                      |

## REFERENCES

1. Harvin JA, Maxim T, Inaba K, et al. Mortality after emergent trauma laparotomy: A multicenter, retrospective study. *J Trauma Acute Care Surg* 2017;83:464-8.
2. Creanga AA, Syverson C, Seed K, Callaghan WM. Pregnancy-Related Mortality in the United States, 2011-2013. *Obstet Gynecol* 2017;130:366-73.
3. Farooq N, Galiatsatos P, Aulakh JK, Higgins C, Martinez A. Massive transfusion practice in non-trauma related hemorrhagic shock. *J Crit Care* 2018;43:65-9.
4. Tien HC, Spencer F, Tremblay LN, Rizoli SB, Brenneman FD. Preventable deaths from hemorrhage at a level I Canadian trauma center. *J Trauma* 2007;62:142-6.
5. Deneux-Tharoux C, Saucedo M. [Epidemiology of maternal mortality in France, 2010-2012]. *Gynecol Obstet Fertil Senol* 2017;45:S8-S21.
6. Berg CJ, Harper MA, Atkinson SM, et al. Preventability of pregnancy-related deaths: results of a state-wide review. *Obstet Gynecol* 2005;106:1228-34.
7. Young PP, Cotton BA, Goodnough LT. Massive transfusion protocols for patients with substantial hemorrhage. *Transfus Med Rev* 2011;25:293-303.
8. Milligan C, Higginson I, Smith JE. Emergency department staff knowledge of massive transfusion for trauma: the need for an evidence based protocol. *Emerg Med J* 2011;28:870-2.
9. Khan S, Allard S, Weaver A, Barber C, Davenport R, Brohi K. A major haemorrhage protocol improves the delivery of blood component therapy and reduces waste in trauma massive transfusion. *Injury* 2013;44:587-92.
10. Nunez TC, Young PP, Holcomb JB, Cotton BA. Creation, implementation, and maturation of a massive transfusion protocol for the exsanguinating trauma patient. *J Trauma* 2010;68:1498-505.
11. Cotton BA, Dossett LA, Au BK, Nunez TC, Robertson AM, Young PP. Room for (performance) improvement: provider-related factors associated with poor outcomes in massive transfusion. *J Trauma* 2009;67:1004-12.
12. Trembl AB, Gorlin JB, Dutton RP, Scavone BM. Massive Transfusion Protocols: A Survey of Academic Medical Centers in the United States. *Anesth Analg* 2017;124:277-81.
13. Chin V, Cope S, Yeh CH, et al. Massive hemorrhage protocol survey: Marked variability and absent in one-third of hospitals in Ontario, Canada. *Injury* 2019;50:46-53.
14. Cannon JW, Khan MA, Raja AS, et al. Damage control resuscitation in patients with severe traumatic hemorrhage: A practice management guideline from the Eastern Association for the Surgery of Trauma. *J Trauma Acute Care Surg* 2017;82:605-17.
15. Bawazeer M, Ahmed N, Izadi H, McFarlan A, Nathens A, Pavenski K. Compliance with a massive transfusion protocol (MTP) impacts patient outcome. *Injury* 2015;46:21-8.
16. Boukdedid R, Abdoul H, Loustau M, Sibony O, Alberti C. Using and reporting the Delphi method for selecting healthcare quality indicators: a systematic review. *PLoS One* 2011;6:e20476.
17. Junger S, Payne SA, Brine J, Radbruch L, Brearley SG. Guidance on Conducting and REporting DElphi Studies (CREDES) in palliative care: Recommendations based on a methodological systematic review. *Palliat Med* 2017;31:684-706.
18. Etchill E, Sperry J, Zuckerbraun B, et al. The confusion continues: results from an American Association for the Surgery of Trauma survey on massive transfusion practices among United States trauma centers. *Transfusion* 2016;56:2478-86.
19. Benz D, Balogh ZJ. Damage control surgery: current state and future directions. *Curr Opin Crit Care* 2017;23:491-7.
20. Germanos S, Gourgiotis S, Villias C, Bertucci M, Dimopoulos N, Salemis N. Damage control surgery in the abdomen: an approach for the management of severe injured patients. *Int J Surg* 2008;6:246-52.
21. Rossaint R, Bouillon B, Cerny V, et al. The European guideline on management of major bleeding and coagulopathy following trauma: fourth edition. *Crit Care* 2016;20:100.
22. Khan S, Davenport R, Raza I, et al. Damage control resuscitation using blood component therapy in standard doses has a limited effect on coagulopathy during trauma hemorrhage. *Intensive Care Med* 2015;41:239-47.

23. Etchill EW, Myers SP, McDaniel LM, et al. Should All Massively Transfused Patients Be Treated Equally? An Analysis of Massive Transfusion Ratios in the Nontrauma Setting. *Crit Care Med* 2017;45:1311-6.
24. Teixeira PG, Inaba K, Karamanos E, et al. The survival impact of plasma to red blood cell ratio in massively transfused non-trauma patients. *Eur J Trauma Emerg Surg* 2017;43:393-8.
25. Gorlin JB, Peters J, Van Buren N, Murphy S, Richardson C. The confusion continues: evolving nature of massive transfusion protocol practice may reflect lack of evidence to support a single solution that fits all. *Transfusion* 2017;57:1322-4.
26. Plackett TP, Cherry DC, Delk G, et al. Clinical practice guideline adherence during Operation Inherent Resolve. *J Trauma Acute Care Surg* 2017;83:S66-S70.
27. Gillissen A, van den Akker T, Caram-Deelder C, et al. Coagulation parameters during the course of severe postpartum hemorrhage: a nationwide retrospective cohort study. *Blood Adv* 2018;2:2433-42.
28. Revert M, Rozenberg P, Cottenet J, Quantin C. Intrauterine Balloon Tamponade for Severe Postpartum Hemorrhage. *Obstet Gynecol* 2018;131:143-9.
29. Jairath V, Kahan BC, Logan RF, et al. Outcomes following acute nonvariceal upper gastrointestinal bleeding in relation to time to endoscopy: results from a nationwide study. *Endoscopy* 2012;44:723-30.
30. Shemesh E, Czerniak A, Klein E, Pines A, Bat L. A comparison between emergency and delayed endoscopic injection sclerotherapy of bleeding esophageal varices in nonalcoholic portal hypertension. *J Clin Gastroenterol* 1990;12:5-9.
31. Karkouti K, Callum J, Wijeyesundera DN, et al. Point-of-Care Hemostatic Testing in Cardiac Surgery: A Stepped-Wedge Clustered Randomized Controlled Trial. *Circulation* 2016;134:1152-62.
32. Lee AC, Reduque LL, Luban NL, Ness PM, Anton B, Heitmiller ES. Transfusion-associated hyperkalemic cardiac arrest in pediatric patients receiving massive transfusion. *Transfusion* 2014;54:244-54.
33. Girelli G, Antoncicchi S, Casadei AM, et al. Recommendations for transfusion therapy in neonatology. *Blood Transfus* 2015;13:484-97.
34. Muszynski JA, Reeder RW, Hall MW, et al. RBC Transfusion Practice in Pediatric Extracorporeal Membrane Oxygenation Support. *Crit Care Med* 2018;46:e552-e9.
35. Howarth C, Banerjee J, Aladangady N. Red Blood Cell Transfusion in Preterm Infants: Current Evidence and Controversies. *Neonatology* 2018;114:7-16.
36. Hilton G, Daniels K, Goldhaber-Fiebert SN, Lipman S, Carvalho B, Butwick A. Checklists and multidisciplinary team performance during simulated obstetric hemorrhage. *Int J Obstet Anesth* 2016;25:9-16.
37. Delaney M, Roberts J, Mazor R, et al. Bleeding emergencies in neonatal and paediatric patients: improving the quality of care using simulation. *Transfus Med* 2018.
38. Kamerer JL. Massive transfusion protocol simulation: compound femur fracture and hypovolemic shock. *Simul Healthc* 2012;7:196-200.
39. Brydges R, Hatala R, Zendejas B, Erwin PJ, Cook DA. Linking simulation-based educational assessments and patient-related outcomes: a systematic review and meta-analysis. *Acad Med* 2015;90:246-56.
40. Gjeraa K, Moller TP, Ostergaard D. Efficacy of simulation-based trauma team training of non-technical skills. A systematic review. *Acta Anaesthesiol Scand* 2014;58:775-87.
41. Murphy M, Curtis K, Lam MK, Palmer CS, Hsu J, McCloughen A. Simulation-based multidisciplinary team training decreases time to critical operations for trauma patients. *Injury* 2018;49:953-8.
42. Josey K, Smith ML, Kayani AS, et al. Hospitals with more-active participation in conducting standardized in-situ mock codes have improved survival after in-hospital cardiopulmonary arrest. *Resuscitation* 2018;133:47-52.
43. Maddry JK, Perez CA, Mora AG, Lear JD, Savell SC, Bebartha VS. Impact of prehospital medical evacuation (MEDEVAC) transport time on combat mortality in patients with non-compressible torso injury and traumatic amputations: a retrospective study. *Mil Med Res* 2018;5:22.
44. Meyer DE, Vincent LE, Fox EE, et al. Every minute counts: Time to delivery of initial massive transfusion cooler and its impact on mortality. *J Trauma Acute Care Surg* 2017;83:19-24.
45. Acker SN, Bredbeck B, Partrick DA, Kulungowski AM, Barnett CC, Bensard DD. Shock index, pediatric age-adjusted (SIPA) is more accurate than age-adjusted hypotension for trauma team activation. *Surgery* 2017;161:803-7.

- 1
- 2
- 3
- 4 46. Schroll R, Swift D, Tatum D, et al. Accuracy of shock index versus ABC score to predict need for massive transfusion in trauma patients. *Injury* 2018;49:15-9.
- 5 47. Meyer DE, Cotton BA, Fox EE, et al. A comparison of resuscitation intensity and critical administration threshold in predicting early mortality among bleeding patients: A multicenter validation in 680 major
- 6 transfusion patients. *J Trauma Acute Care Surg* 2018;85:691-6.
- 7 48. Neff LP, Cannon JW, Morrison JJ, Edwards MJ, Spinella PC, Borgman MA. Clearly defining pediatric
- 8 massive transfusion: cutting through the fog and friction with combat data. *J Trauma Acute Care Surg*
- 9 2015;78:22-8; discussion 8-9.
- 10 49. Foster JC, Sappenfield JW, Smith RS, Kiley SP. Initiation and Termination of Massive Transfusion
- 11 Protocols: Current Strategies and Future Prospects. *Anesth Analg* 2017;125:2045-55.
- 12 50. Briggs A, Raja AS, Joyce MF, et al. The role of nontechnical skills in simulated trauma resuscitation. *J*
- 13 *Surg Educ* 2015;72:732-9.
- 14 51. McLaughlin CM, Wieck MM, Barin EN, et al. Impact of simulation-based training on perceived provider
- 15 confidence in acute multidisciplinary pediatric trauma resuscitation. *Pediatr Surg Int* 2018;34:1353-62.
- 16 52. Gregg SC, Heffernan DS, Connolly MD, et al. Teaching leadership in trauma resuscitation: Immediate
- 17 feedback from a real-time, competency-based evaluation tool shows long-term improvement in resident
- 18 performance. *J Trauma Acute Care Surg* 2016;81:729-34.
- 19 53. Khan S, Brohi K, Chana M, et al. Hemostatic resuscitation is neither hemostatic nor resuscitative in
- 20 trauma hemorrhage. *J Trauma Acute Care Surg* 2014;76:561-7; discussion 7-8.
- 21 54. Johnsen BH, Westli HK, Espevik R, Wisborg T, Brattebo G. High-performing trauma teams: frequency of
- 22 behavioral markers of a shared mental model displayed by team leaders and quality of medical performance.
- 23 *Scand J Trauma Resusc Emerg Med* 2017;25:109.
- 24 55. Graw JA, Eymann K, Kork F, Zoremba M, Burchard R. Risk perception of blood transfusions - a
- 25 comparison of patients and allied healthcare professionals. *BMC Health Serv Res* 2018;18:122.
- 26 56. Schonewille H, Honohan A, van der Watering LM, et al. Incidence of alloantibody formation after ABO-
- 27 D or extended matched red blood cell transfusions: a randomized trial (MATCH study). *Transfusion*
- 28 2016;56:311-20.
- 29 57. Barty RL, Pai M, Liu Y, et al. Group O RBCs: where is universal donor blood being used. *Vox Sang*
- 30 2017;112:336-42.
- 31 58. Zeller MP, Barty R, Dunbar NM, et al. An international investigation into AB plasma administration in
- 32 hospitals: how many AB plasma units were infused? The HABSWIN study. *Transfusion* 2018;58:151-7.
- 33 59. Valentine J, Lane T, Miller N, Kopko P. Two transfusion-related acute lung injury episodes in a recipient
- 34 of AB plasma from multiparous donors. *Ther Apher Dial* 2013;17:640-2.
- 35 60. Brohi K, Singh J, Heron M, Coats T. Acute traumatic coagulopathy. *J Trauma* 2003;54:1127-30.
- 36 61. Chandler WL, Ferrell C, Trimble S, Moody S. Development of a rapid emergency hemorrhage panel.
- 37 *Transfusion* 2010;50:2547-52.
- 38 62. Baxter J, Cranfield KR, Clark G, Harris T, Bloom B, Gray AJ. Do lactate levels in the emergency
- 39 department predict outcome in adult trauma patients? A systematic review. *J Trauma Acute Care Surg*
- 40 2016;81:555-66.
- 41 63. Bouzat P, Ageron FX, Charbit J, et al. Modelling the association between fibrinogen concentration on
- 42 admission and mortality in patients with massive transfusion after severe trauma: an analysis of a large regional
- 43 database. *Scand J Trauma Resusc Emerg Med* 2018;26:55.
- 44 64. Alam A, Olarte R, Callum J, et al. Hypothermia indices among severely injured trauma patients
- 45 undergoing urgent surgery: A single-centred retrospective quality review and analysis. *Injury* 2018;49:117-23.
- 46 65. Margarido C, Ferns J, Chin V, et al. Massive hemorrhage protocol activation in obstetrics: a 5-year
- 47 quality performance review. *Int J Obstet Anesth* 2018.
- 48 66. Jurkovich GJ, Greiser WB, Luterman A, Curreri PW. Hypothermia in trauma victims: an ominous
- 49 predictor of survival. *J Trauma* 1987;27:1019-24.
- 50 67. Lester ELW, Fox EE, Holcomb JB, et al. The Impact of Hypothermia on Outcomes in Massively
- 51 Transfused Patients. *J Trauma Acute Care Surg* 2018.
- 52
- 53
- 54
- 55
- 56
- 57
- 58
- 59
- 60

- 1  
2  
3 68. Perlman R, Callum J, Laflamme C, et al. A recommended early goal-directed management guideline for  
4 the prevention of hypothermia-related transfusion, morbidity, and mortality in severely injured trauma  
5 patients. *Crit Care* 2016;20:107.
- 6 69. Rajagopalan S, Mascha E, Na J, Sessler DI. The effects of mild perioperative hypothermia on blood loss  
7 and transfusion requirement. *Anesthesiology* 2008;108:71-7.
- 8 70. Lundgren P, Henriksson O, Naredi P, Bjornstig U. The effect of active warming in prehospital trauma  
9 care during road and air ambulance transportation - a clinical randomized trial. *Scand J Trauma Resusc Emerg  
10 Med* 2011;19:59.
- 11 71. Fadeyi EA, Emery W, Simmons JH, Jones MR, Pomper GJ. Implementation of a new blood cooler insert  
12 and tracking technology with educational initiatives and its effect on reducing red blood cell wastage.  
13 *Transfusion* 2017;57:2477-82.
- 14 72. Metcalf RA, Baker SA, Goodnough LT, Shah N. Transportation Cooler Interventions Reduce Plasma and  
15 RBC Product Wastage. *Am J Clin Pathol* 2016;146:18-24.
- 16 73. Gonzalez-Porras JR, Graciani IF, Perez-Simon JA, et al. Prospective evaluation of a transfusion policy of  
17 D+ red blood cells into D- patients. *Transfusion* 2008;48:1318-24.
- 18 74. Yazer MH, Triulzi DJ. Detection of anti-D in D- recipients transfused with D+ red blood cells. *Transfusion*  
19 *2007;47:2197-201.*
- 20 75. Bhella S, Gerard L, Lin Y, Rizoli S, Callum J. Obstetric and trauma database review at a single institution  
21 finds the optimal maternal age restriction for the transfusion of O- blood to women involved in trauma to be 45  
22 years. *Transfusion* 2012;52:2488-9.
- 23 76. Cid J, Lozano M, Ziman A, et al. Low frequency of anti-D alloimmunization following D+ platelet  
24 transfusion: the Anti-D Alloimmunization after D-incompatible Platelet Transfusions (ADAPT) study. *Br J  
25 Haematol* 2015;168:598-603.
- 26 77. Holcomb JB, Tilley BC, Baraniuk S, et al. Transfusion of plasma, platelets, and red blood cells in a 1:1:1  
27 vs a 1:1:2 ratio and mortality in patients with severe trauma: the PROPPR randomized clinical trial. *JAMA*  
28 *2015;313:471-82.*
- 29 78. Nascimento B, Callum J, Tien H, et al. Effect of a fixed-ratio (1:1:1) transfusion protocol versus  
30 laboratory-results-guided transfusion in patients with severe trauma: a randomized feasibility trial. *CMAJ*  
31 *2013;185:E583-9.*
- 32 79. Mesar T, Larentzakis A, Dzik W, Chang Y, Velmahos G, Yeh DD. Association Between Ratio of Fresh  
33 Frozen Plasma to Red Blood Cells During Massive Transfusion and Survival Among Patients Without Traumatic  
34 Injury. *JAMA Surg* 2017;152:574-80.
- 35 80. Dzik WH, Blajchman MA, Fergusson D, et al. Clinical review: Canadian National Advisory Committee on  
36 Blood and Blood Products--Massive transfusion consensus conference 2011: report of the panel. *Crit Care*  
37 *2011;15:242.*
- 38 81. Ranucci M, Isgro G, Soro G, Conti D, De Toffol B. Efficacy and safety of recombinant activated factor vii  
39 in major surgical procedures: systematic review and meta-analysis of randomized clinical trials. *Arch Surg*  
40 *2008;143:296-304; discussion*
- 41 82. Simpson E, Lin Y, Stanworth S, Birchall J, Doree C, Hyde C. Recombinant factor VIIa for the prevention  
42 and treatment of bleeding in patients without haemophilia. *Cochrane Database Syst Rev* 2012:CD005011.
- 43 83. Karkouti K, Callum J, Rao V, et al. Protocol for a phase III, non-inferiority, randomised comparison of a  
44 new fibrinogen concentrate versus cryoprecipitate for treating acquired hypofibrinogenaemia in bleeding  
45 cardiac surgical patients: the FIBRES trial. *BMJ Open* 2018;8:e020741.
- 46 84. Galas FR, de Almeida JP, Fukushima JT, et al. Hemostatic effects of fibrinogen concentrate compared  
47 with cryoprecipitate in children after cardiac surgery: a randomized pilot trial. *J Thorac Cardiovasc Surg*  
48 *2014;148:1647-55.*
- 49 85. Schochl H, Nienaber U, Maegele M, et al. Transfusion in trauma: thromboelastometry-guided  
50 coagulation factor concentrate-based therapy versus standard fresh frozen plasma-based therapy. *Crit Care*  
51 *2011;15:R83.*
- 52 86. Schlimp CJ, Voelckel W, Inaba K, Maegele M, Schochl H. Impact of fibrinogen concentrate alone or with  
53 prothrombin complex concentrate (+/- fresh frozen plasma) on plasma fibrinogen level and fibrin-based clot  
54 strength (FIBTEM) in major trauma: a retrospective study. *Scand J Trauma Resusc Emerg Med* 2013;21:74.
- 55  
56  
57

- 1  
2  
3 87. Noga T, Bruce AA, Blain H, Nahirniak S. Four-factor prothrombin complex concentrates in paediatric  
4 patients - a retrospective case series. *Vox Sang* 2016;110:253-7.
- 5 88. Maskens C, Downie H, Wendt A, et al. Hospital-based transfusion error tracking from 2005 to 2010:  
6 identifying the key errors threatening patient transfusion safety. *Transfusion* 2014;54:66-73; quiz 65.
- 7 89. Strauss R, Downie H, Wilson A, et al. Sample collection and sample handling errors submitted to the  
8 transfusion error surveillance system, 2006 to 2015. *Transfusion* 2018;58:1697-707.
- 9 90. Collaborators C-t, Shakur H, Roberts I, et al. Effects of tranexamic acid on death, vascular occlusive  
10 events, and blood transfusion in trauma patients with significant haemorrhage (CRASH-2): a randomised,  
11 placebo-controlled trial. *Lancet* 2010;376:23-32.
- 12 91. Collaborators WT. Effect of early tranexamic acid administration on mortality, hysterectomy, and other  
13 morbidities in women with post-partum haemorrhage (WOMAN): an international, randomised, double-blind,  
14 placebo-controlled trial. *Lancet* 2017;389:2105-16.
- 15 92. Gayet-Ageron A, Prieto-Merino D, Ker K, et al. Effect of treatment delay on the effectiveness and safety  
16 of antifibrinolytics in acute severe haemorrhage: a meta-analysis of individual patient-level data from 40 138  
17 bleeding patients. *Lancet* 2018;391:125-32.
- 18 93. Roberts I, Shakur H, Coats T, et al. The CRASH-2 trial: a randomised controlled trial and economic  
19 evaluation of the effects of tranexamic acid on death, vascular occlusive events and transfusion requirement in  
20 bleeding trauma patients. *Health Technol Assess* 2013;17:1-79.
- 21 94. Morrison JJ, Dubose JJ, Rasmussen TE, Midwinter MJ. Military Application of Tranexamic Acid in  
22 Trauma Emergency Resuscitation (MATTERs) Study. *Arch Surg* 2012;147:113-9.
- 23 95. Beno S, Ackery AD, Callum J, Rizoli S. Tranexamic acid in pediatric trauma: why not? *Crit Care*  
24 2014;18:313.
- 25 96. Nishijima DK, Monuteaux MC, Faraoni D, et al. Tranexamic Acid Use in United States Children's  
26 Hospitals. *J Emerg Med* 2016;50:868-74 e1.
- 27 97. Roberts I, Coats T, Edwards P, et al. HALT-IT--tranexamic acid for the treatment of gastrointestinal  
28 bleeding: study protocol for a randomised controlled trial. *Trials* 2014;15:450.
- 29  
30  
31  
32  
33  
34  
35  
36  
37  
38  
39  
40  
41  
42  
43  
44  
45  
46  
47  
48  
49  
50  
51  
52  
53  
54  
55  
56  
57  
58  
59  
60

**Figure 1.** Frequencies of Likert scores at time of final consensus round are shown for each MHP statement. Panelists were asked to indicate agreement on a 7 point Likert scale (7=highest level of agreement). Black and gray denote Likert scores below 5 and green shades show Likert scores of 5 and above. Where questions are “no”, “uncertain”, or “yes” these are noted as black, gray and green, respectively.

Confidential



1  
2  
3  
4  
5  
6  
7  
8  
9  
10  
11  
12  
13  
14  
15  
16  
17  
18  
19  
20  
21  
22  
23  
24  
25  
26  
27  
28  
29  
30  
31  
32  
33  
34  
35  
36  
37  
38  
39  
40  
41  
42  
43  
44  
45  
46  
47  
48  
49  
50  
51  
52  
53  
54  
55  
56  
57  
58  
59  
60

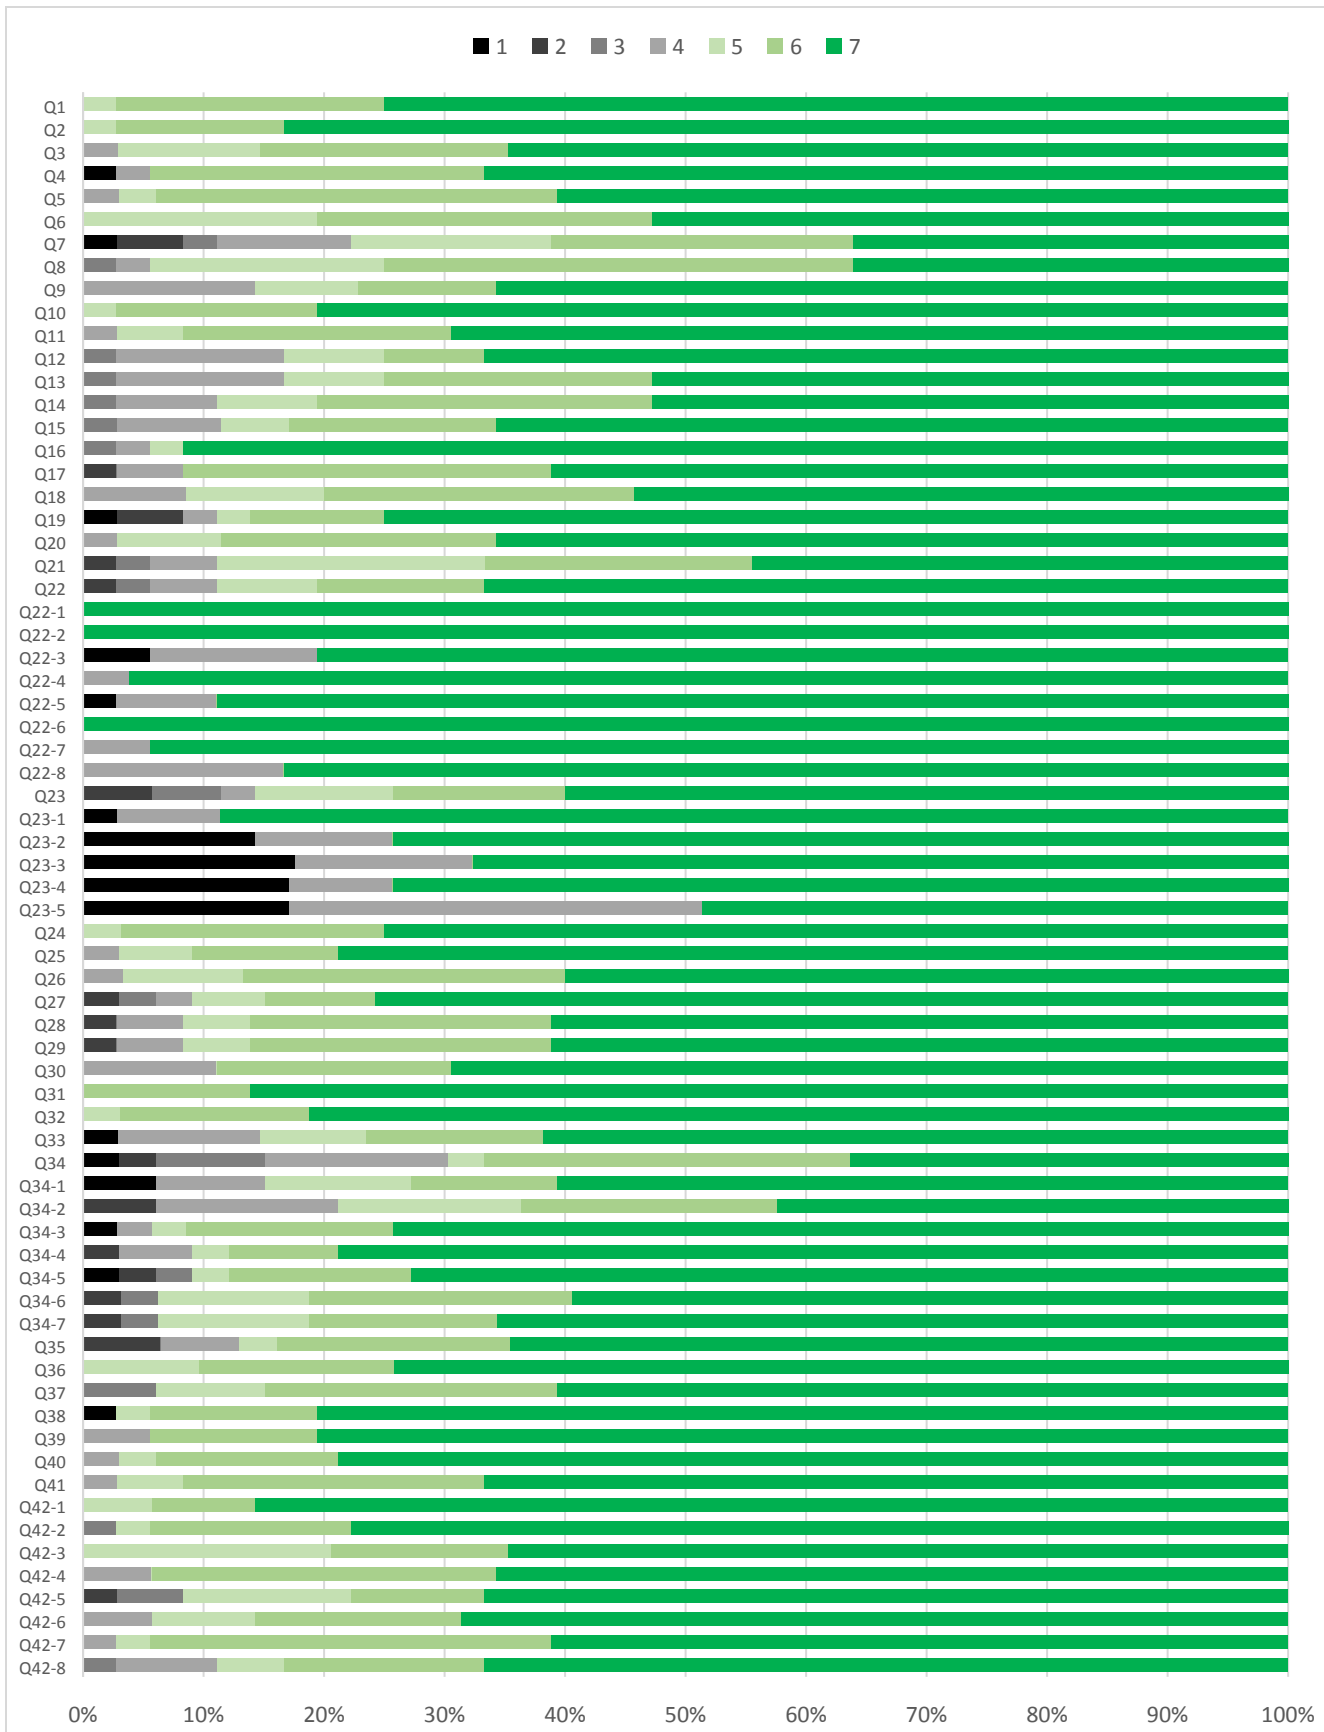

Supplement: supp_7.3.E546_2019-0042-original-submission.pdf [file supp_7.3.E546_2019-0042-original-submission.pdf]
