# Supplementary material
Source: PubMed Central journal article supplement (PMC6726467)
Supplement: supp_7.3.E546_2019-0042-1-at.pdf [file supp_7.3.E546_2019-0042-1-at.pdf]

| <b>Appendix 1 (as supplied by the authors): Panellists and conflicts of interest</b> |                                                                                                                                                                                                                                                                    |                                                                                            |
|--------------------------------------------------------------------------------------|--------------------------------------------------------------------------------------------------------------------------------------------------------------------------------------------------------------------------------------------------------------------|--------------------------------------------------------------------------------------------|
| Name                                                                                 | Role                                                                                                                                                                                                                                                               | Disclosures                                                                                |
| <b>Steering committee</b>                                                            |                                                                                                                                                                                                                                                                    |                                                                                            |
| Jeannie Callum                                                                       | Adult Hematologist and Transfusion Medicine Specialist, tertiary care academic center with trauma program, panelist and steering committee member                                                                                                                  | Funding for research from Canadian Blood Services and Octapharma                           |
| Calvin Yeh                                                                           | Resident in the Royal College Emergency Medicine Training Program, tertiary care academic center with trauma program, panelist and steering committee member                                                                                                       | None                                                                                       |
| Stephanie Cope                                                                       | Project Coordinator, Ontario Regional Blood Coordinating Network, steering committee member                                                                                                                                                                        | None                                                                                       |
| Troy Thompson                                                                        | Regional Manager, Ontario Regional Blood Coordinating Network, panelist and steering committee member                                                                                                                                                              | None                                                                                       |
| Russell D. MacDonald                                                                 | Emergency Medicine and Prehospital Care Specialist/Medical Director; tertiary care academic centre with trauma program; provincial air and land critical care transport program; municipal and paramedic/ambulance service, panelist and steering committee member | None                                                                                       |
| Barto Nascimento                                                                     | Trauma Team Leader, tertiary academic trauma centre, panelist and steering committee member                                                                                                                                                                        | None                                                                                       |
| Katerina Pavenski                                                                    | Adult Hematologist and Transfusion Medicine Specialist, tertiary care academic centre with trauma program, steering committee member                                                                                                                               | Funding for research from Octapharma, CSL Behring                                          |
| <b>Panellist</b>                                                                     |                                                                                                                                                                                                                                                                    |                                                                                            |
| Andrew Petrosioniak                                                                  | Emergency Physician and Trauma Team Leader, tertiary care academic centre with trauma program                                                                                                                                                                      | None                                                                                       |
| Mark J. McVey                                                                        | Pediatric Anesthesiologist, tertiary pediatric academic centre with trauma program                                                                                                                                                                                 | None                                                                                       |
| Victoria Chin                                                                        | University of Waterloo, co-op student, data analysis                                                                                                                                                                                                               | None                                                                                       |
| Keyvan Karkouti                                                                      | Anesthesiologist with expertise in adult cardiovascular surgery related hemorrhage, tertiary care academic centre with cardiac and transplant programs                                                                                                             | Funding for research and honoraria from Instrumentation Laboratory and Octapharma          |
| Avery Nathens                                                                        | Adult Trauma and General Surgeon, tertiary care academic center with trauma program                                                                                                                                                                                | None                                                                                       |
| Kimmo Murto                                                                          | Pediatric Anesthesiologist, former Cardiac Anesthesia specialist and Transfusion Medicine Committee Chair, pediatric tertiary care academic center with trauma program                                                                                             | None                                                                                       |
| Suzanne Beno                                                                         | Pediatric Emergentologist and Pediatric Trauma Specialist, tertiary pediatric academic centre with trauma program                                                                                                                                                  | None                                                                                       |
| Jacob Pendergrast                                                                    | Adult Hematologist and Transfusion Medicine Specialist, Medical Director for numerous rural and remote transfusion services                                                                                                                                        | None                                                                                       |
| Andrew McDonald                                                                      | Adult Trauma Team Leader, Emergency Physician, tertiary care centre; Transport Medicine Physician, Provincial air ambulance service                                                                                                                                | None                                                                                       |
| Neill Adhikari                                                                       | Intensivist, university-affiliated hospital                                                                                                                                                                                                                        | None                                                                                       |
| Asim Alam                                                                            | Anesthesiologist and Transfusion Medicine Specialist, Chief of Anesthesia, North York General Hospital                                                                                                                                                             | Previous consulting funding from Medtronic and Zoll Corporation for non-related activities |
| Donald M. Arnold                                                                     | Adult Hematologist, Director, McMaster Centre for Transfusion Research, Associate Professor, Department of Medicine, McMaster University                                                                                                                           | None                                                                                       |
| Lee Barratt                                                                          | Nurse Practitioner, Regional Geriatric Program, St. Michael's Hospital, formerly Nurse Educator, Emergency Department, at a tertiary care trauma unit                                                                                                              | None                                                                                       |
| Andrew Beckett                                                                       | Civilian trauma and general surgeon, academic tertiary care centre, Surgeon for the National Defense and Canadian Armed Forces                                                                                                                                     | None                                                                                       |
| Sue Brenneman                                                                        | Adult critical care nurse at a trauma hospital                                                                                                                                                                                                                     | None                                                                                       |
| Hina Chaudhry                                                                        | Research Program Manager – CELTIC Connect, Department of Laboratory Medicine, St. Michael's Hospital, (formerly Medical Technical Specialist – Special Coagulation, Department of Laboratory Medicine, St. Michael's Hospital)                                     | None                                                                                       |
| Allison Collins                                                                      | General Pathologist and Laboratory Medical Director, community hospital, Physician Clinical Projects Coordinator with the Ontario Regional Blood Coordinating Network                                                                                              | None                                                                                       |
| Margaret Harvey                                                                      | Patient representative                                                                                                                                                                                                                                             | None                                                                                       |
| Jacinthe Lampron                                                                     | General surgeon with subspecialty in trauma, academic trauma centre                                                                                                                                                                                                | None                                                                                       |
| Clarita Margarido                                                                    | Anesthesiologist; tertiary care academic centre with trauma and high risk obstetrics programs                                                                                                                                                                      | None                                                                                       |

|                    |                                                                                                                                                     |                                                                                                                                                                    |
|--------------------|-----------------------------------------------------------------------------------------------------------------------------------------------------|--------------------------------------------------------------------------------------------------------------------------------------------------------------------|
| Amanda McFarlan    | Registered Nurse Trauma Program Registry Manager & Quality Assurance Specialist, tertiary care academic centre with trauma program                  | None                                                                                                                                                               |
| Wendy Owens        | Program Manager, Ontario Regional Blood Coordinating Network                                                                                        | None                                                                                                                                                               |
| Menaka Pai         | Adult Hematologist and Thrombosis Physician, Transfusion Medicine Quality Specialist, tertiary care academic centre with trauma program             | Speaker honoraria from Novartis and BMS-Pfizer                                                                                                                     |
| Sandro Rizoli      | Adult trauma and general surgeon, academic tertiary centre                                                                                          | None                                                                                                                                                               |
| Theodora Ruijs     | General Pathologist and Transfusion Medicine Laboratory Director, large community hospital                                                          | None                                                                                                                                                               |
| Robert Skeate      | Transfusion Medicine Specialist, Canadian Blood Services Associate Medical Director                                                                 | Funding for research from Canadian Blood Services                                                                                                                  |
| Michelle Sholzberg | Adult Hematologist, Medical Director of Coagulation Laboratory, tertiary care academic centre with trauma program                                   | Unrestricted research funding from Octapharma and Shire, Member of IQMH Hematology Scientific Committee, Member of Test Review and Utilization Committee of MOHLTC |
| Teresa Skelton     | Pediatric Anesthesiologist, tertiary pediatric academic centre with trauma program                                                                  | None                                                                                                                                                               |
| Kelly Syer         | Registered Nurse, Transfusion Safety Officer, community hospital                                                                                    | None                                                                                                                                                               |
| Jami-Lynn Viveiros | MLT in Transfusion Medicine and Tissue Bank, tertiary care academic centre with trauma program                                                      | None                                                                                                                                                               |
| Josee Theriault    | Intensivist, North East Local Health Integration Network critical care lead, northern tertiary academic centre with Trauma program                  | None                                                                                                                                                               |
| Alan Tinmouth      | Adult Hematologist and Hemostasis Expert, tertiary care academic centre                                                                             | research funding from Canadian Blood Services and Canadian Institute for Health Research and medical consultant for Canadian Blood Services                        |
| Rardi van Heest    | General Surgeon, large community hospital                                                                                                           | None                                                                                                                                                               |
| Susan White        | MLT, Hospital Liaison Specialist, Blood Supplier                                                                                                    | None                                                                                                                                                               |
| Michelle P. Zeller | Adult Hematologist and Transfusion Medicine Specialist, tertiary care academic centre with trauma program; Medical Officer, Canadian Blood Services | Funding for research from Canadian Blood Services; Pfizer ad boards                                                                                                |
