# Supplementary material
Source: PubMed Central journal article supplement (PMC6726467)
Supplement: supp_7.3.E546_2019-0042-reporting-checklist.pdf [file supp_7.3.E546_2019-0042-reporting-checklist.pdf]

Reporting requirements as defined by Diamons IR, Grant RC, Feldman BM, et al. Defining consensus: a systematic review recommends methodologic criteria for reporting of Delphi studies. J Clin Epidemiol 2014; 67: 401-9.

| Number | Item                                                                                                                                                                                      | Compliance                                                                                                            |
|--------|-------------------------------------------------------------------------------------------------------------------------------------------------------------------------------------------|-----------------------------------------------------------------------------------------------------------------------|
| 1      | Does the Delphi study aim to address consensus?                                                                                                                                           | Yes.                                                                                                                  |
| 2      | Is the objective of the Delphi study to present results (eg, a list or statement) reflecting the consensus of the group, or does the study aim to merely quantify the level of agreement? | The objective of the Delphi study to present results (eg, a list or statement) reflecting the consensus of the group. |
| 3      | How will participants be selected or excluded?                                                                                                                                            | Selected by a steering committee to represent all stakeholders involved in the management of massive hemorrhage.      |
| 4      | How will the consensus be defined?                                                                                                                                                        | Defined explicitly in the methods for round 1 and rounds 2+                                                           |
| 5      | If applicable, what threshold value will be required for the Delphi to be stopped based on the achievement of consensus?                                                                  | Median 5.5 or higher and no comments to further improve phrasing                                                      |
| 6      | What criteria will be used to determine when to stop the Delphi in the absence of consensus?                                                                                              | Based statement by statement (Median 2.5 or less removed from Delphi process as defined in the methods)               |
| 7      | Were items dropped?                                                                                                                                                                       | Yes due to merging with other related statements                                                                      |
| 8      | What criteria will be used to determine which items to drop?                                                                                                                              | Based statement by statement (Median 2.5 or less removed from Delphi process as defined in the methods)               |
| 9      | What criteria will be used to determine to stop the Delphi process or will the Delphi be run for a specific number of rounds only?                                                        | Median 5.5 or higher and no comments to further improve phrasing                                                      |
